# Supplementary material
Source: publisher figshare collection journal article supplement (https://sage.figshare.com/ndownloader/files/19037312)

## Site 03 (Atexcac inner crater wall)

N 19° 19.822'  
W 097° 27.150'  
2400 m

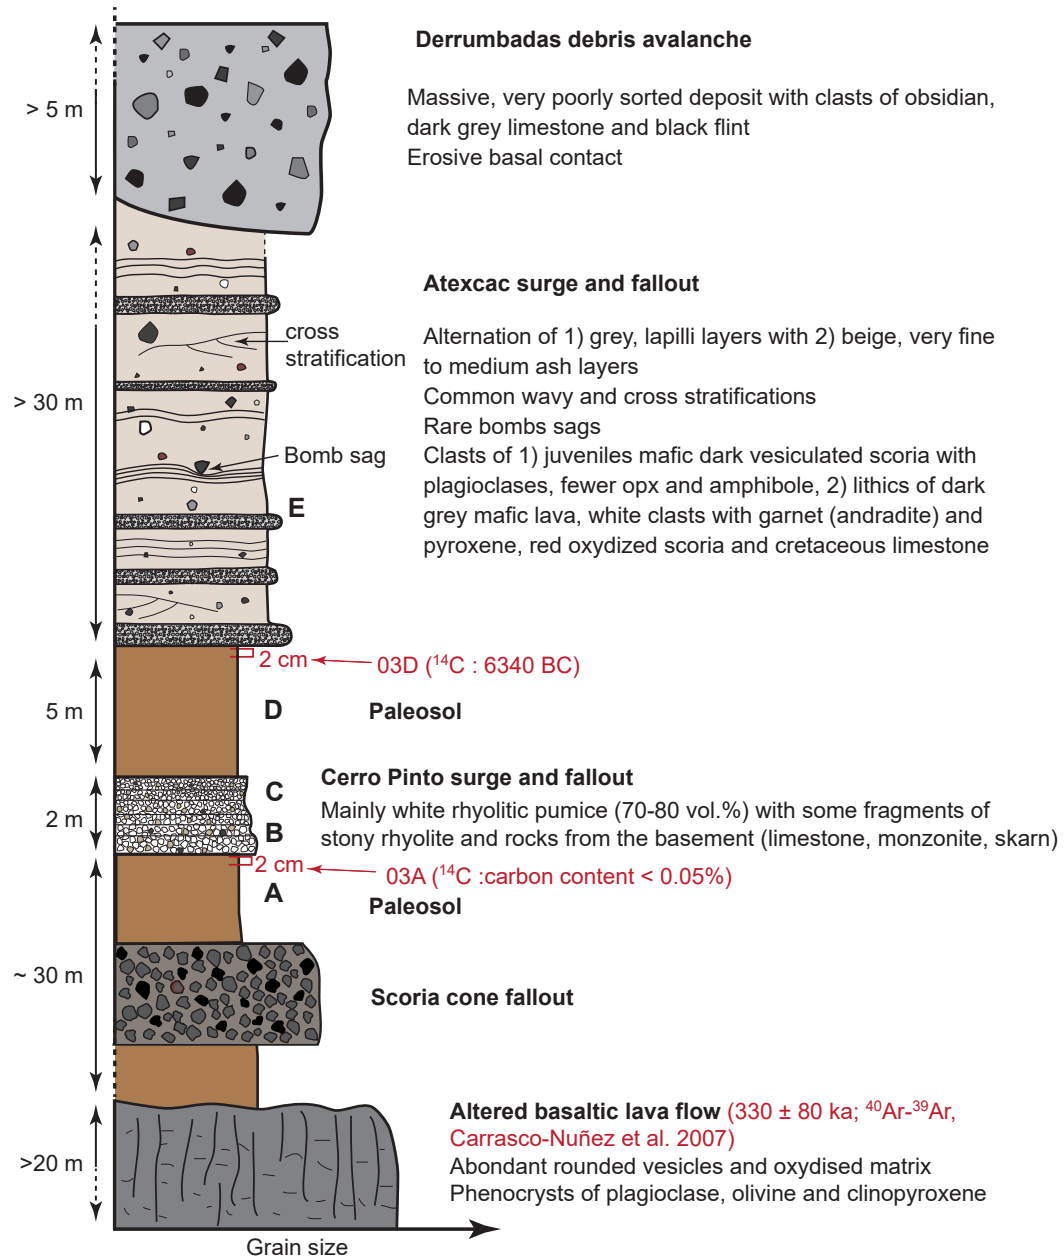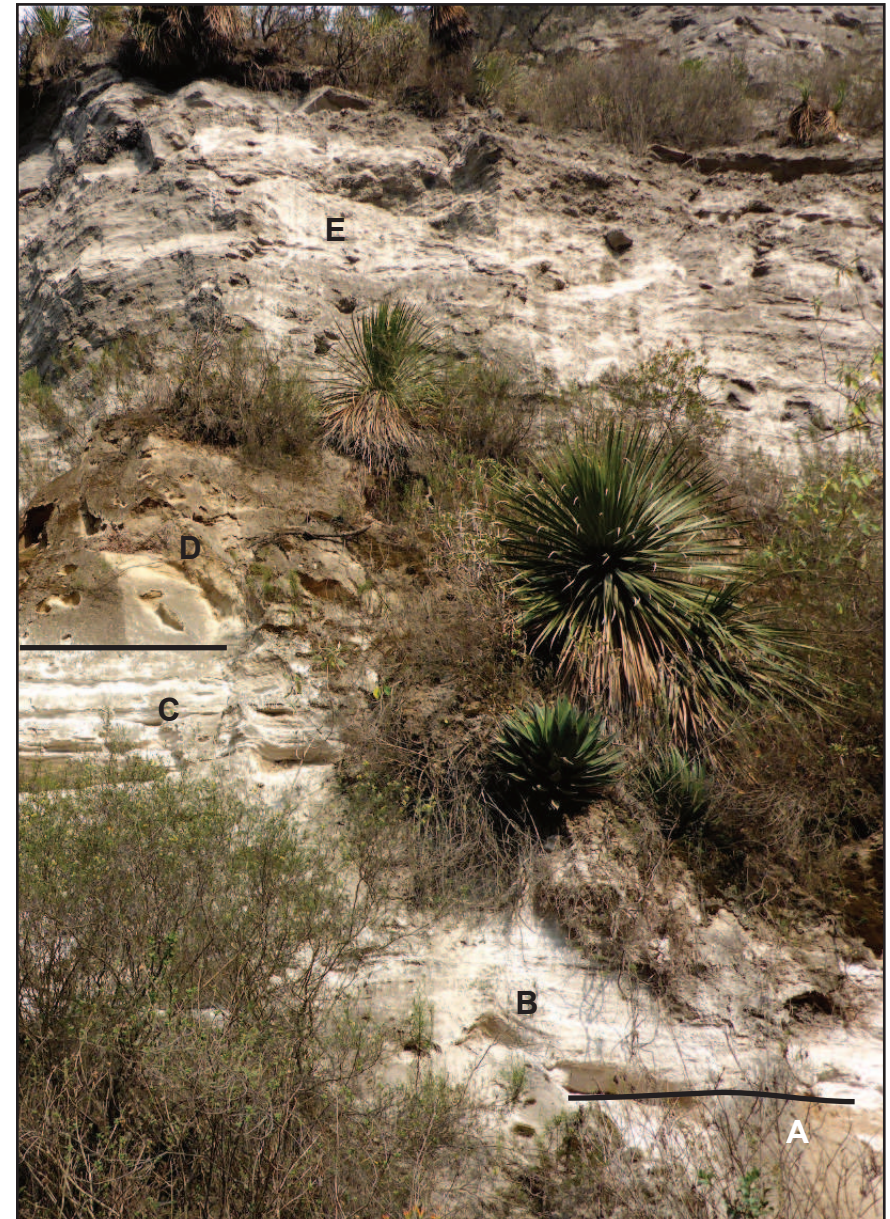



## Site 13 (Tepexitl outer west slopes)

N 19° 13.454'  
W 097° 26.116'  
2455 m

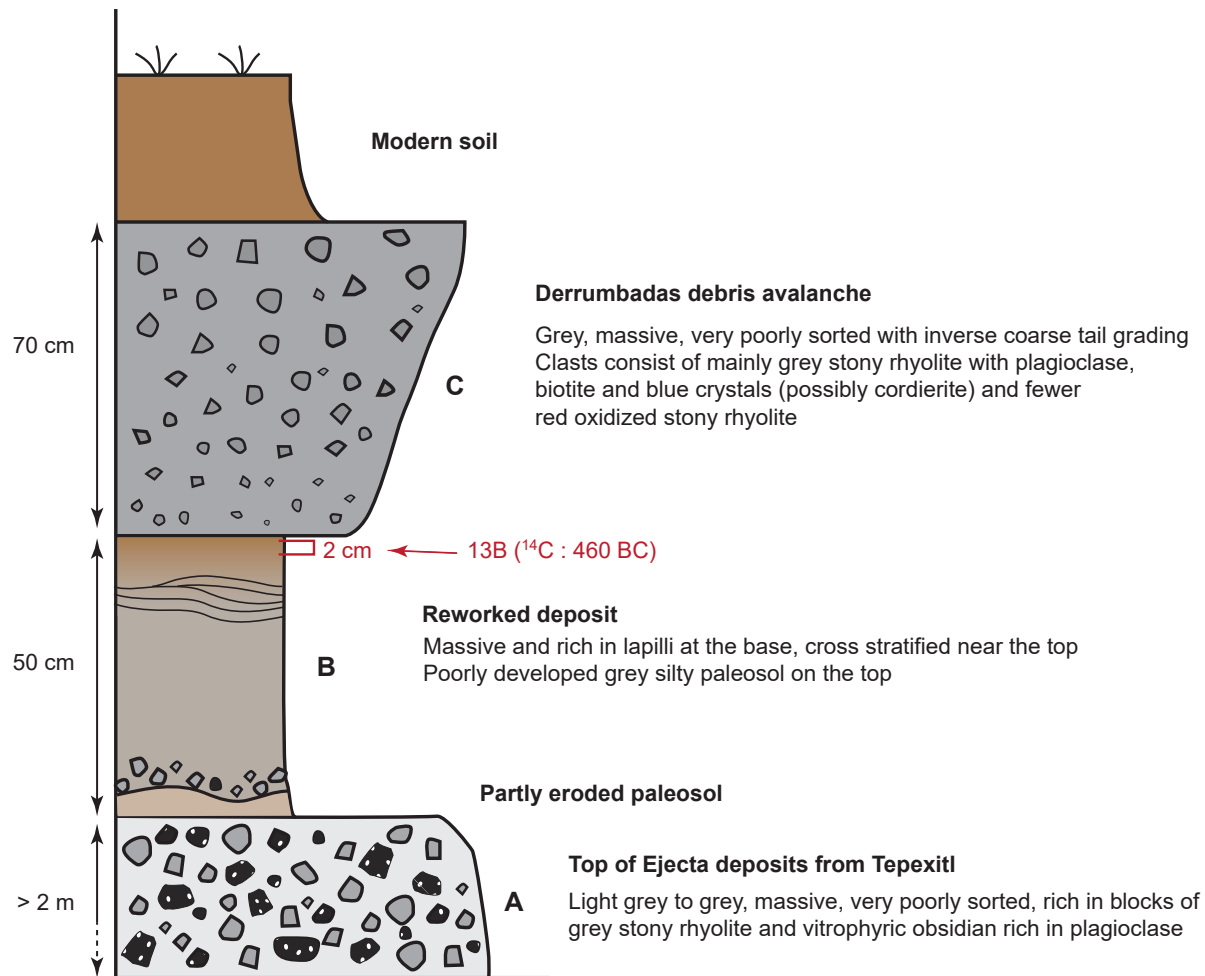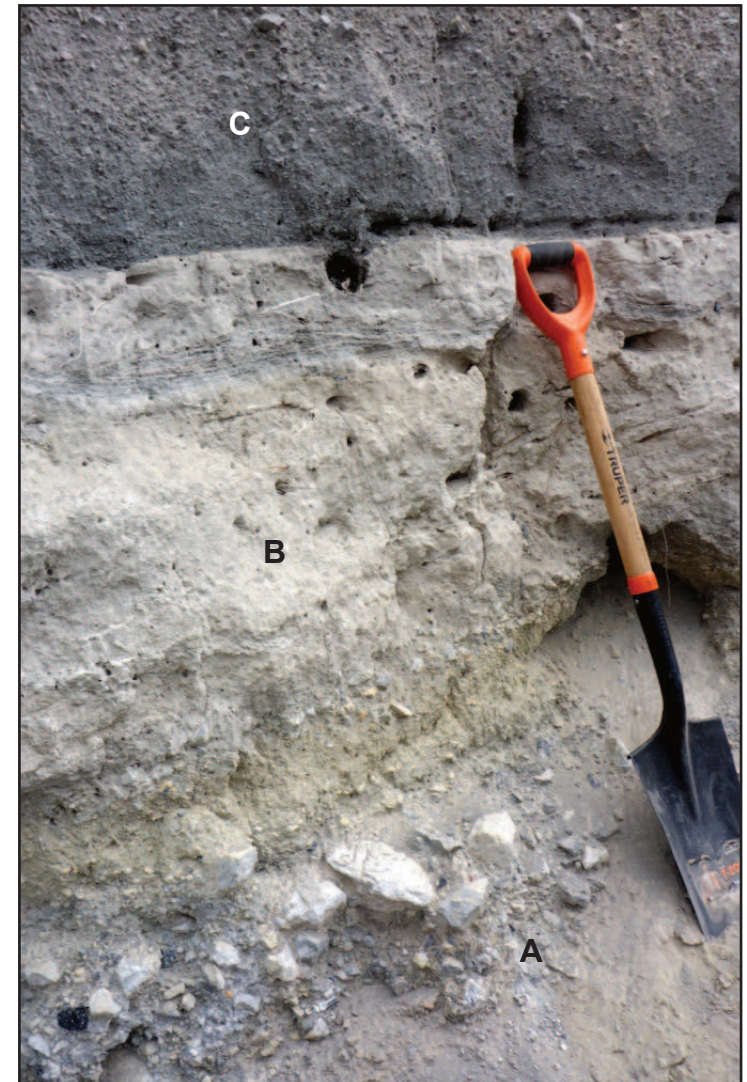

## Site 16 (quarry west derrumbadas)

N 19° 16.627'  
W 097° 28.839'  
2549 m

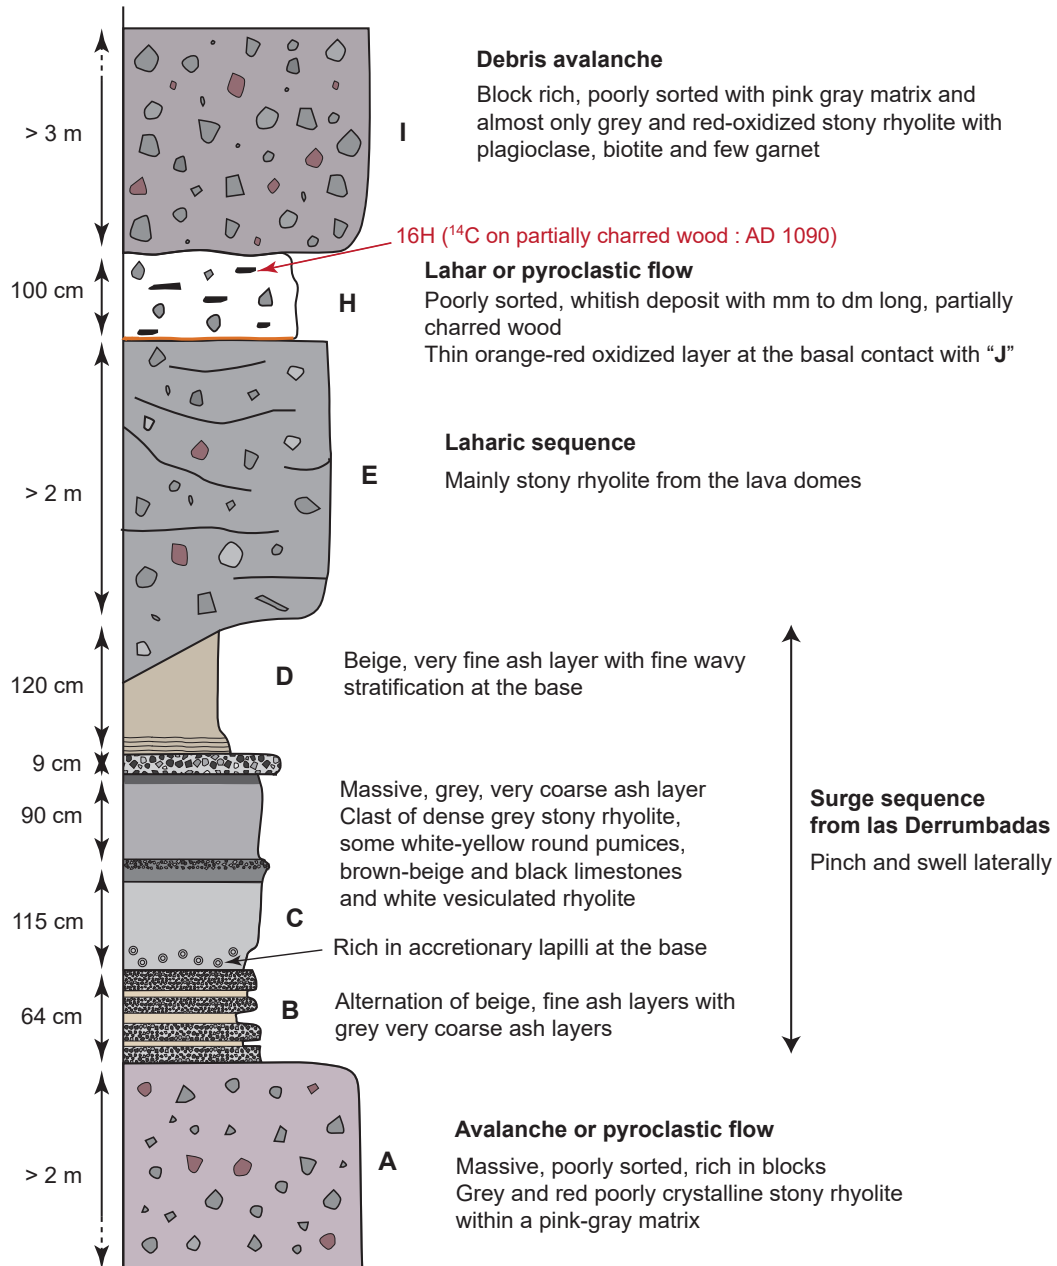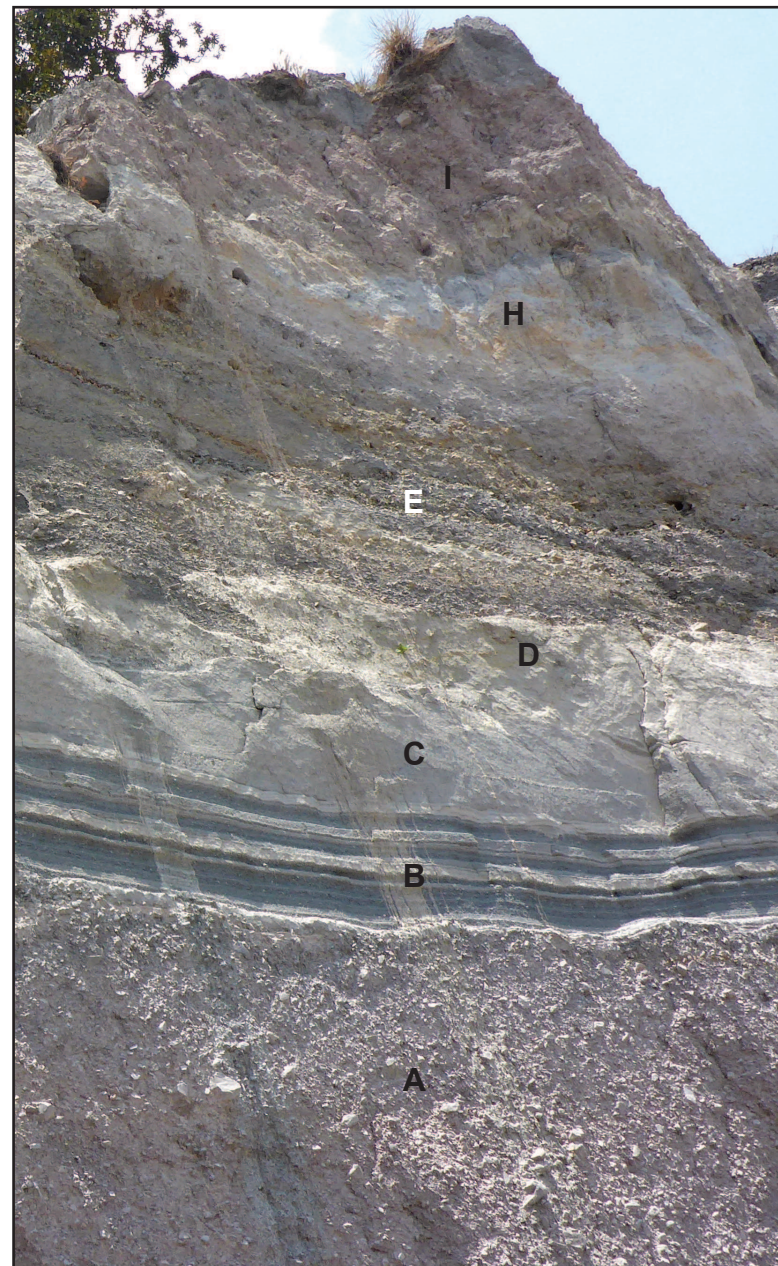



## Site 20 (Venustiano Carranza)

N 19° 13.741  
W 097° 28.634'  
2403 m

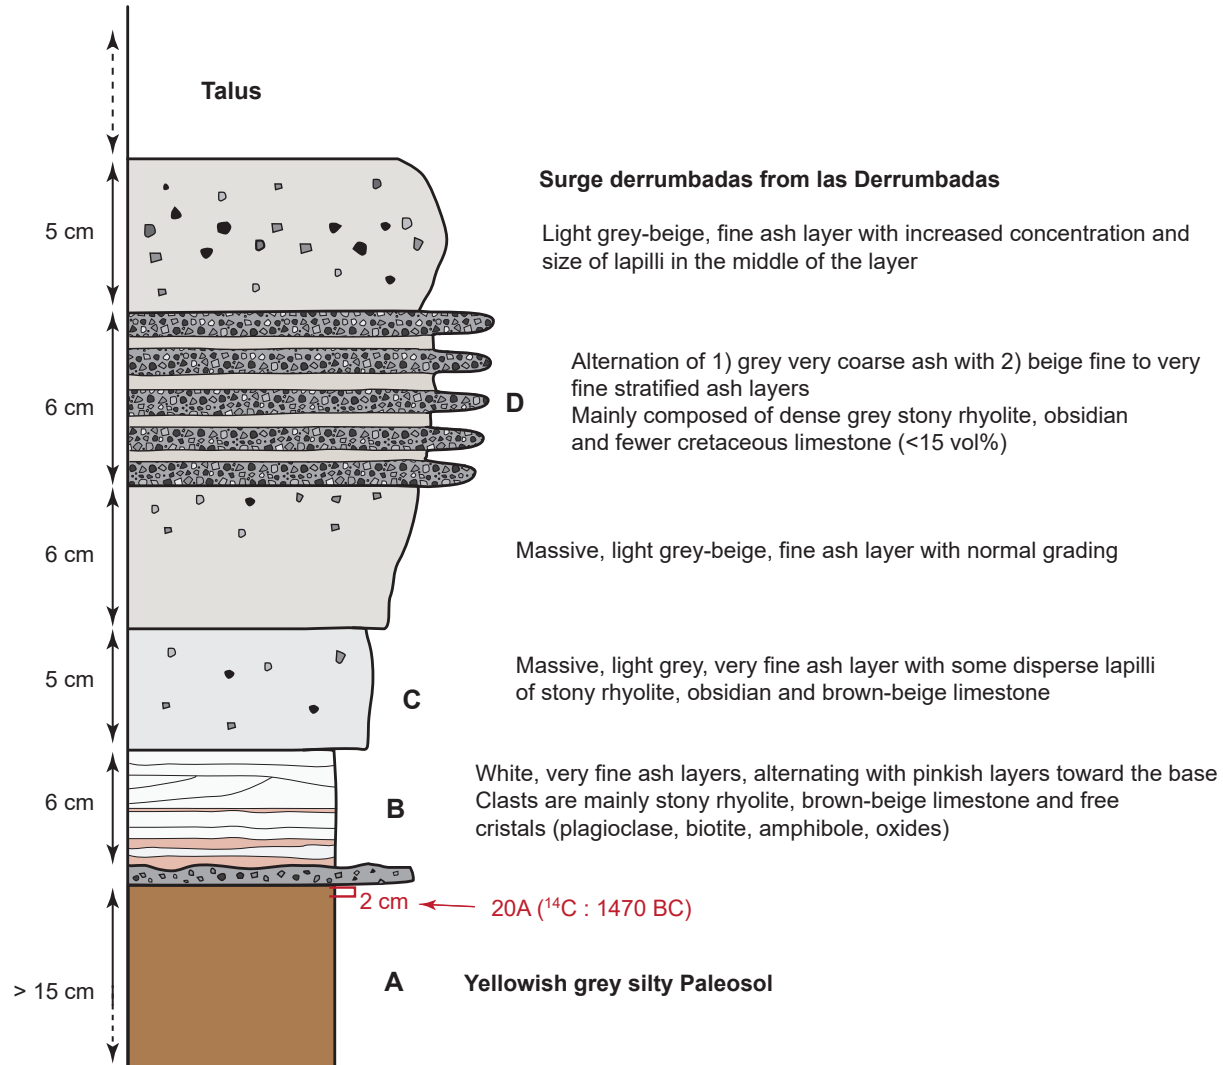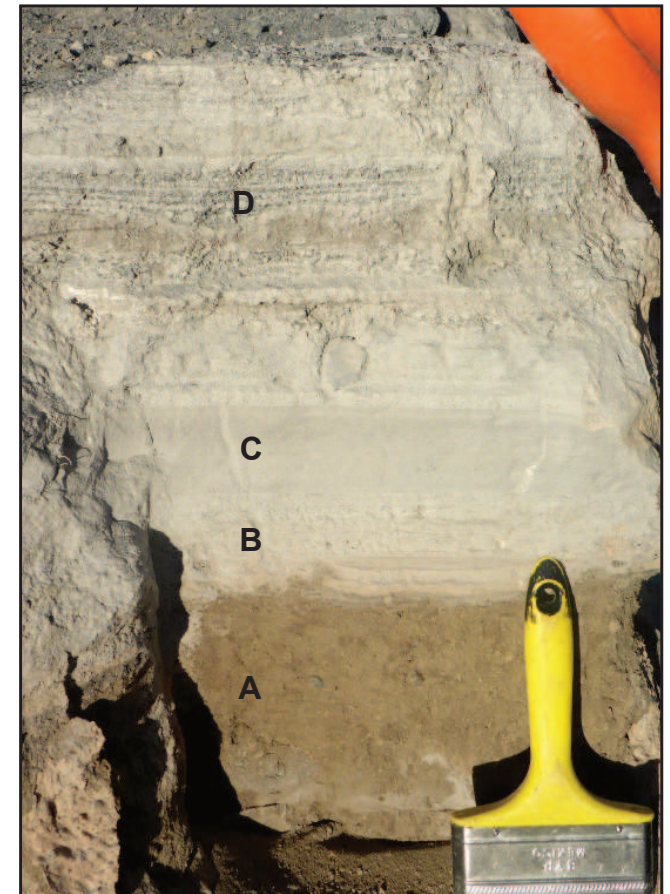



## Site 22 (SW Derrumbadas)

N 19° 14.818'  
W 097° 28.157'  
2476 m

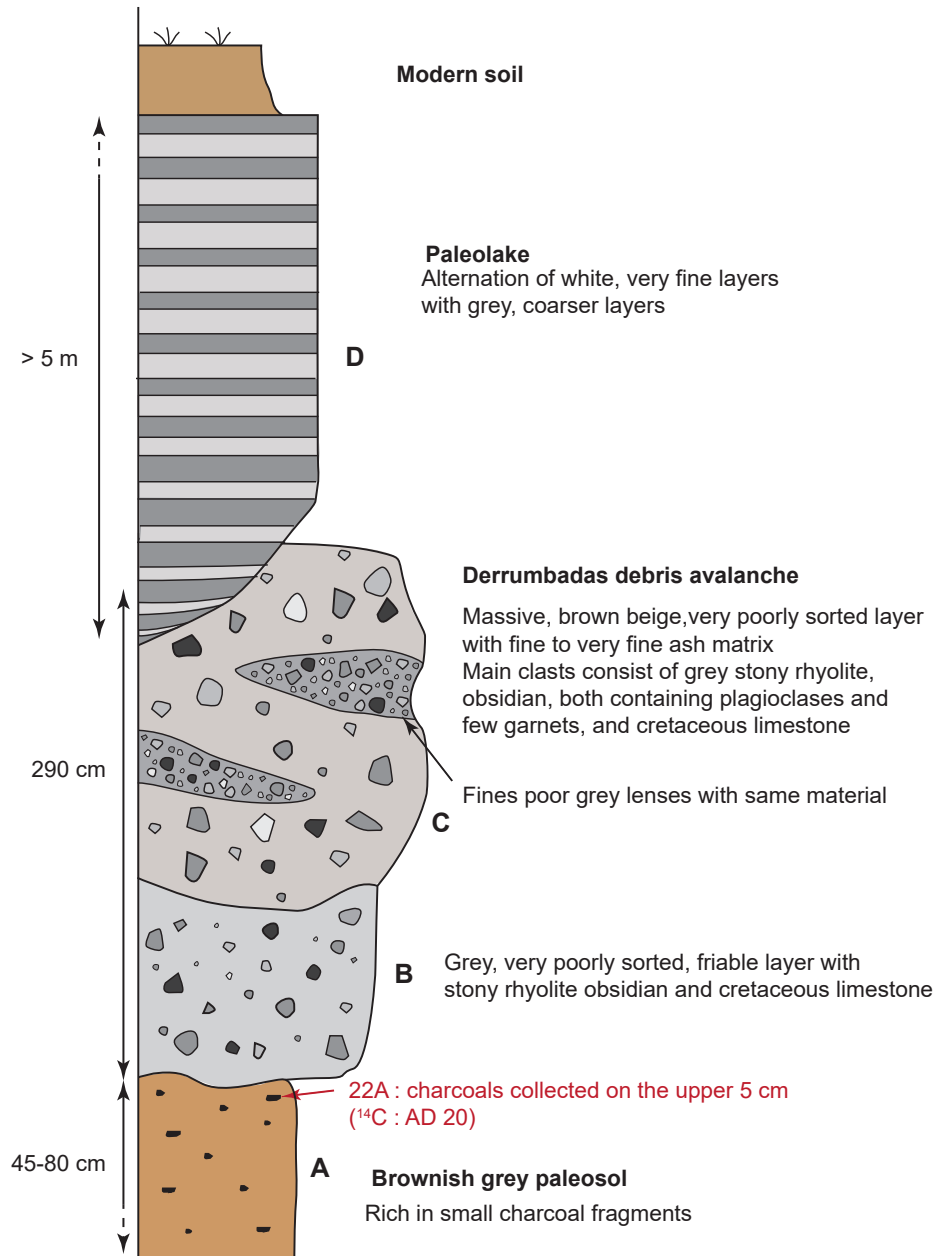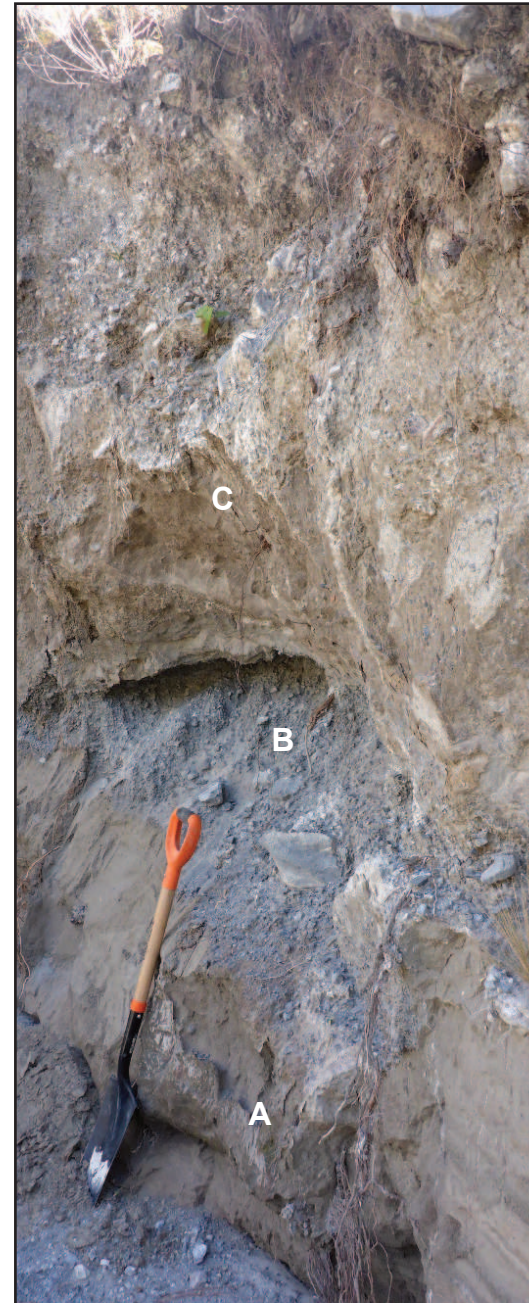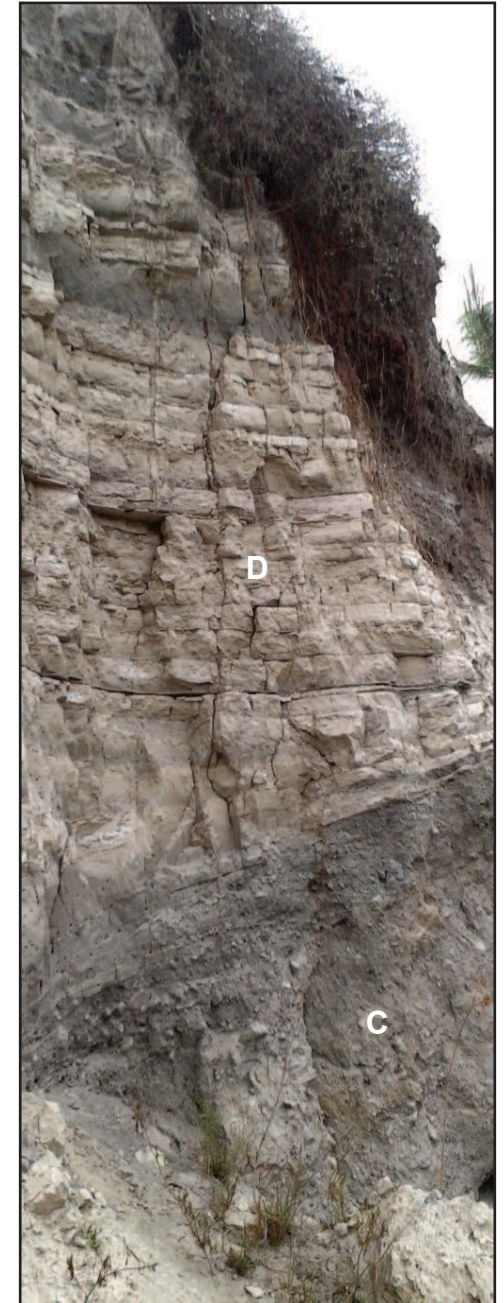

## Site 25 (NW Atexcac)

N 19° 20.389'  
W 097° 27.756'  
2432 m

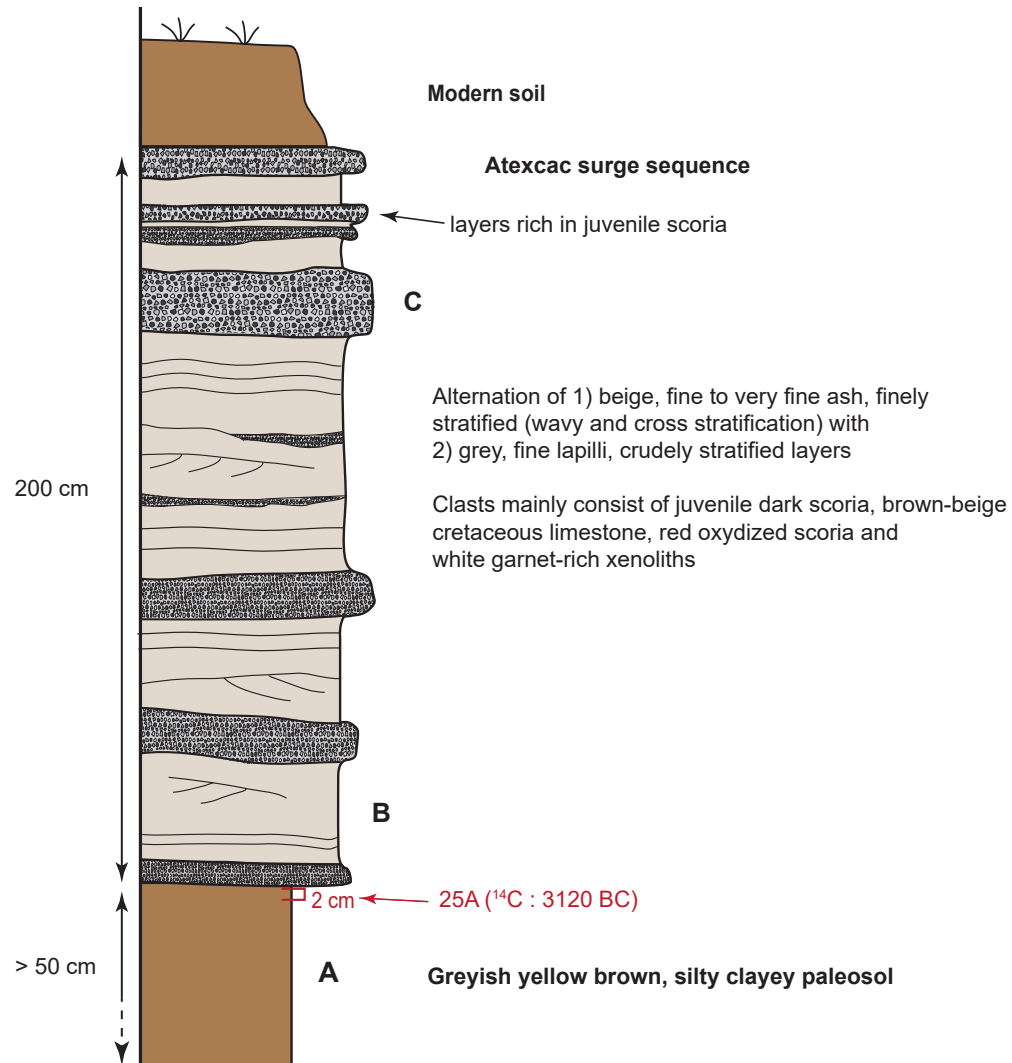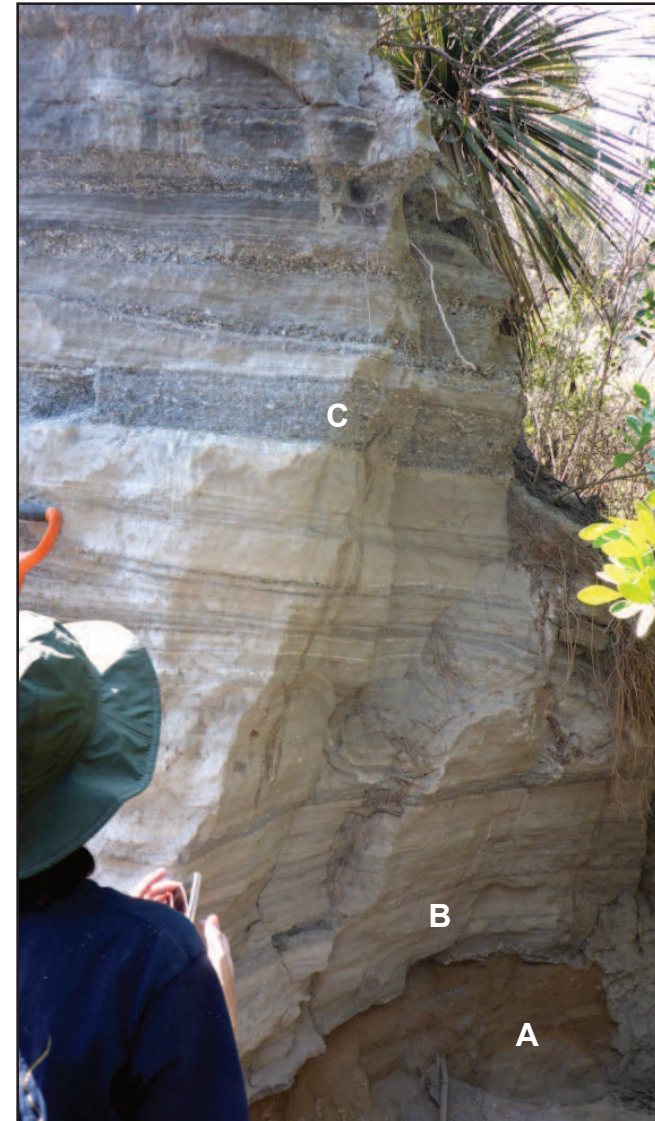



## Site 26 (NW Atexcac)

N 19° 20.336'  
W 097° 27.745'  
2459 m

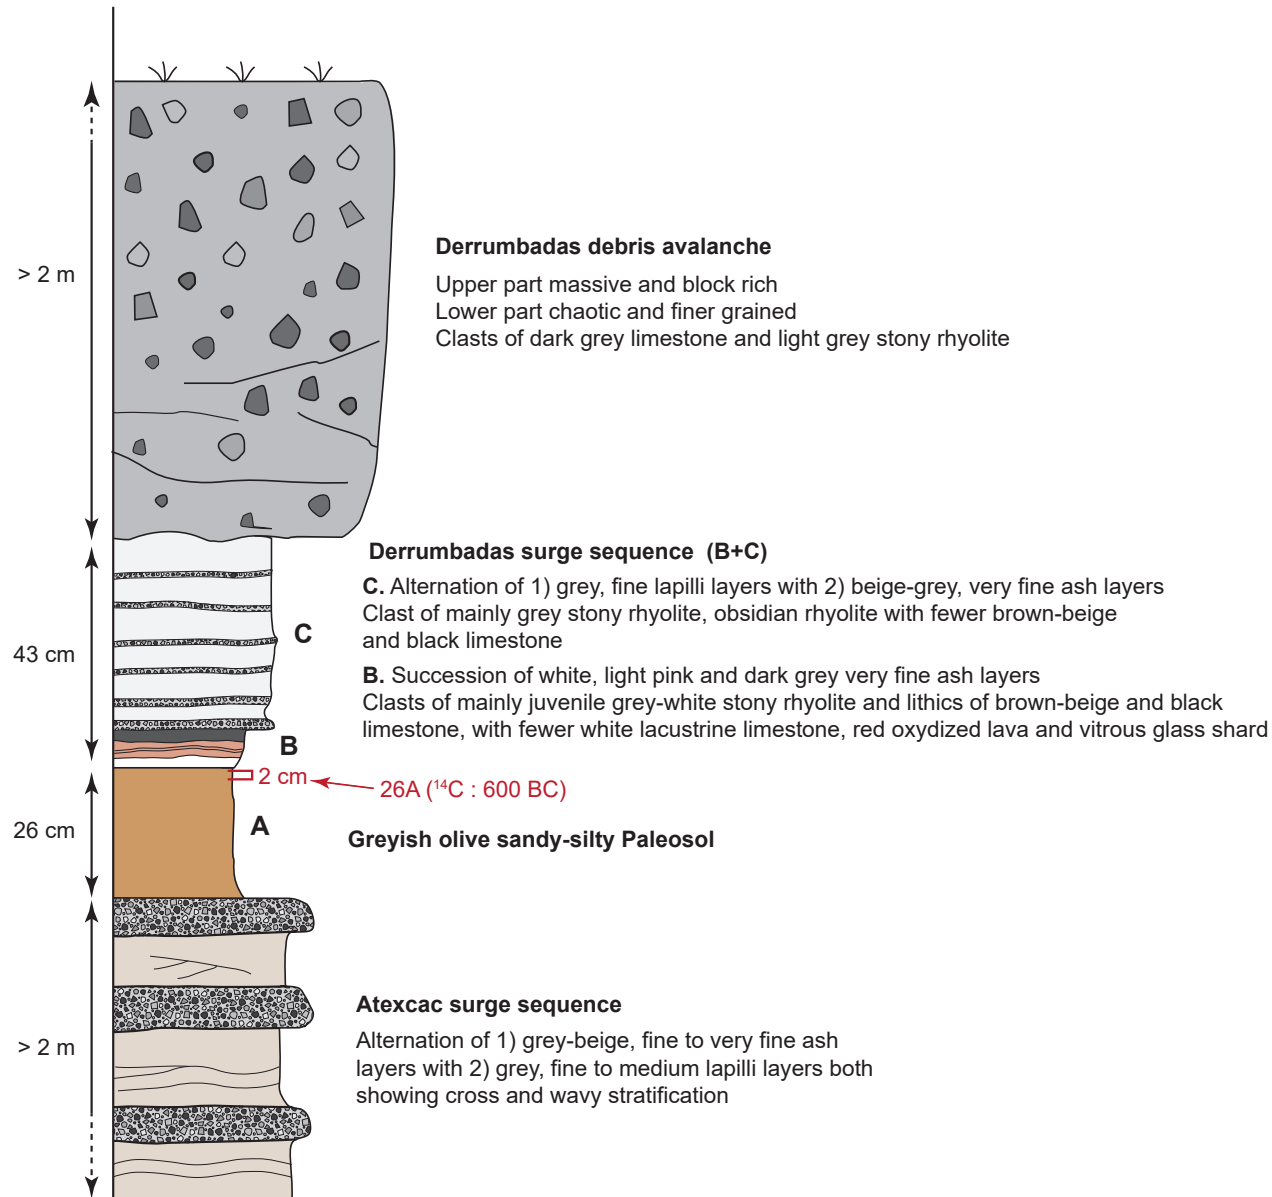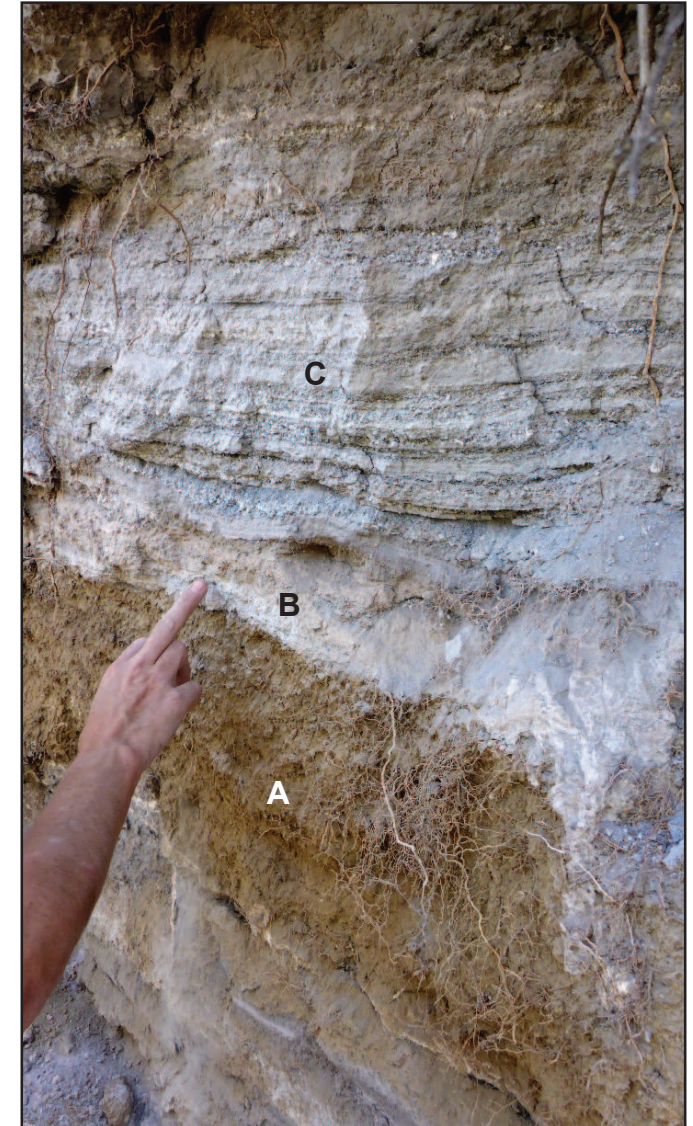

## Site 27 (San Luis Atexcac)

N 19° 20.544'  
W 097° 27.179'  
2436 m

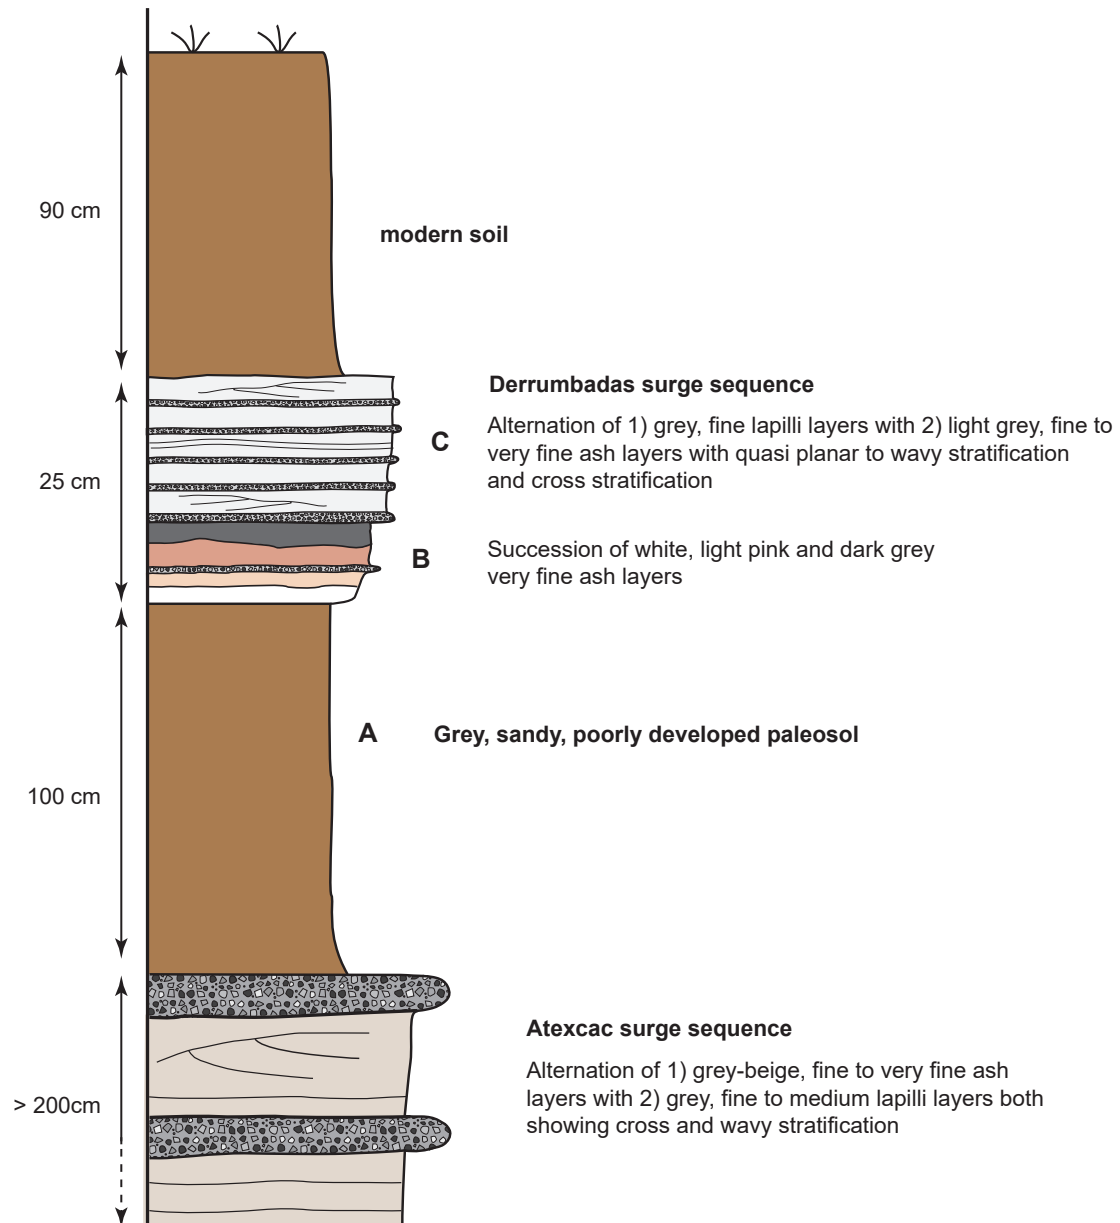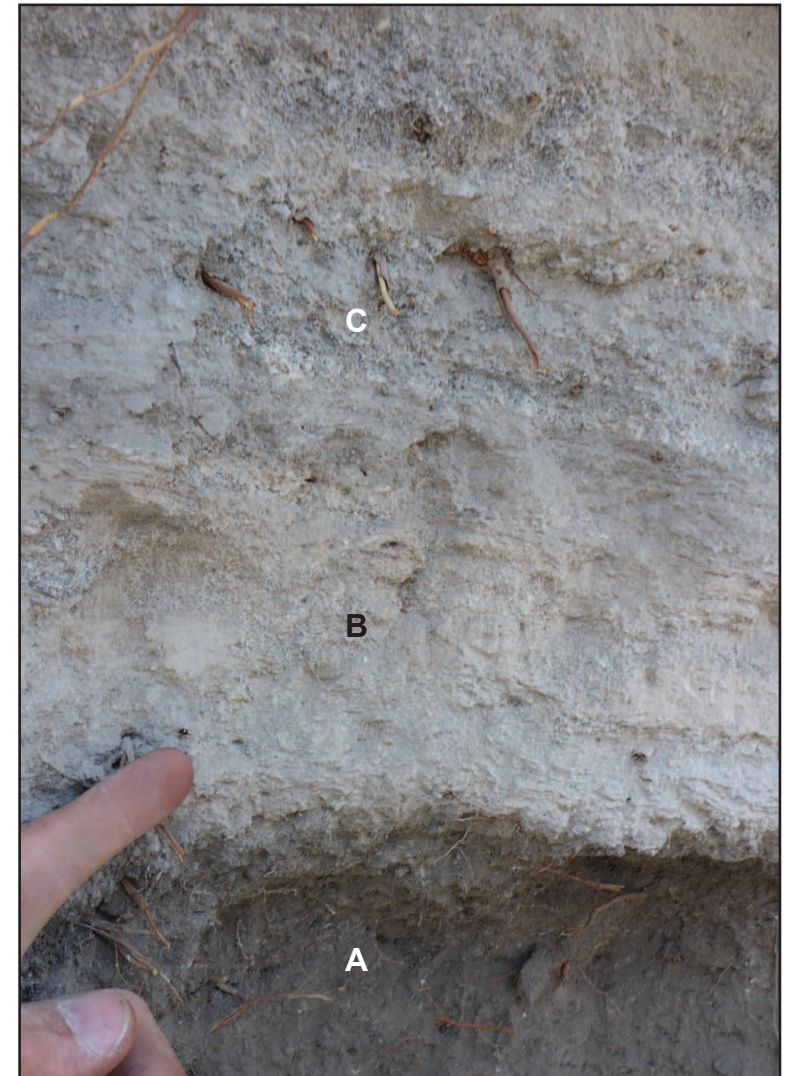



## Site 28 (West of Las Aguilas)

N 19° 19.845'  
W 097° 26.168'  
2417 m

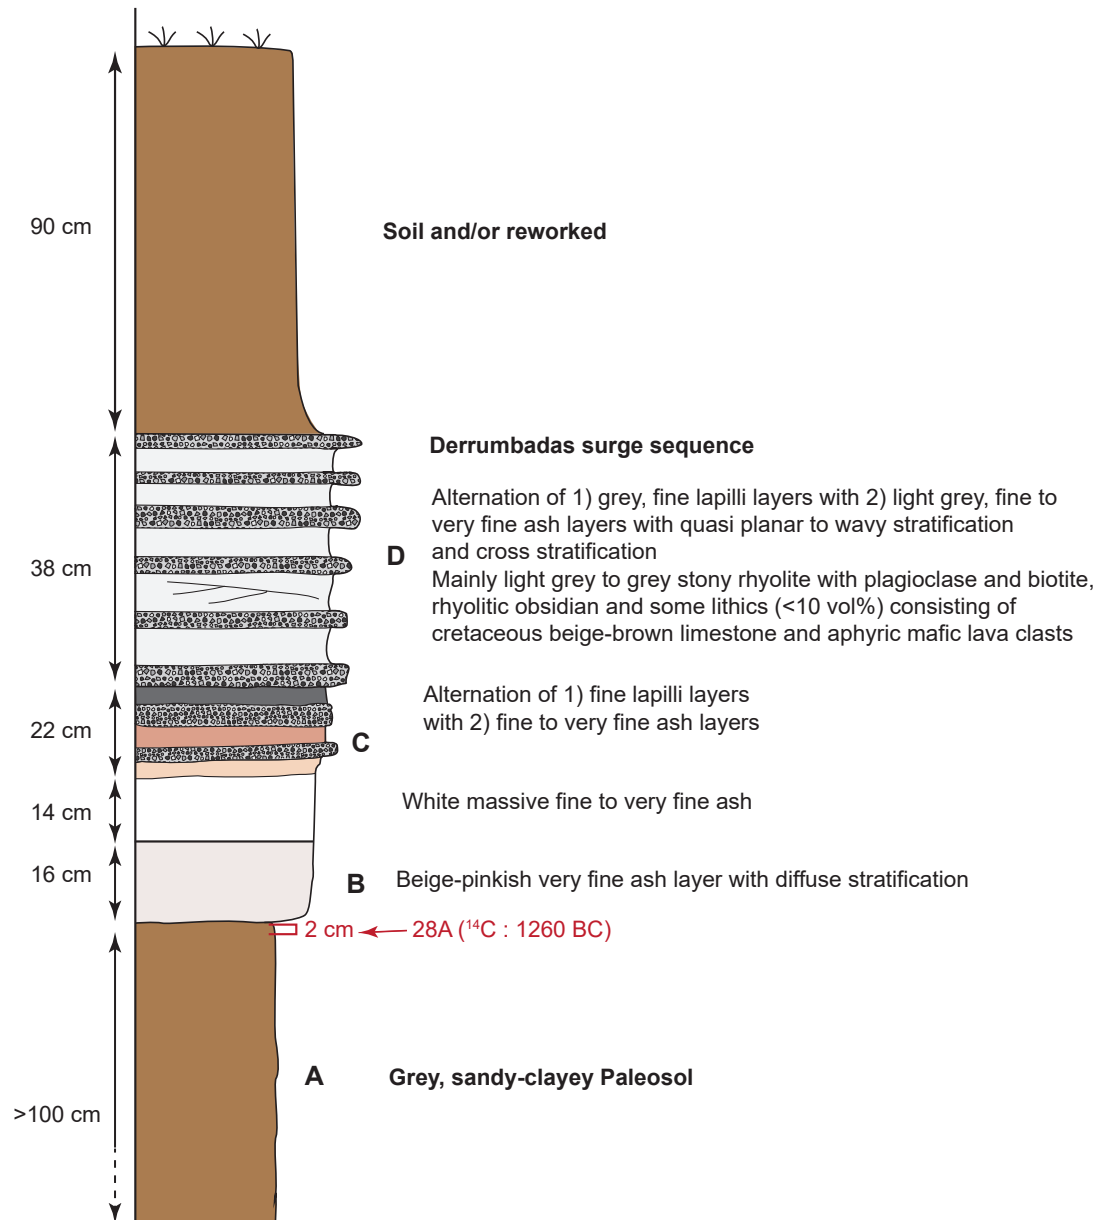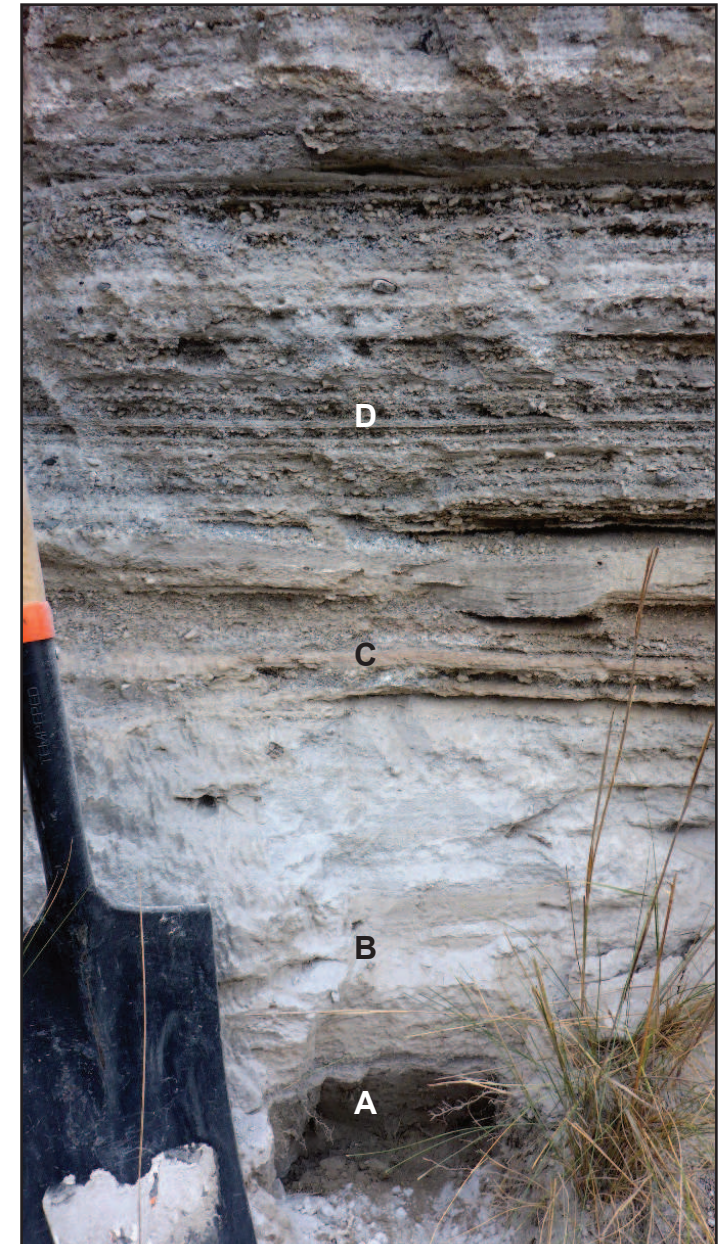

## Site 30 (East of las Derrumbadas)

N 19° 17.603'  
W 097° 24.418'  
2440 m

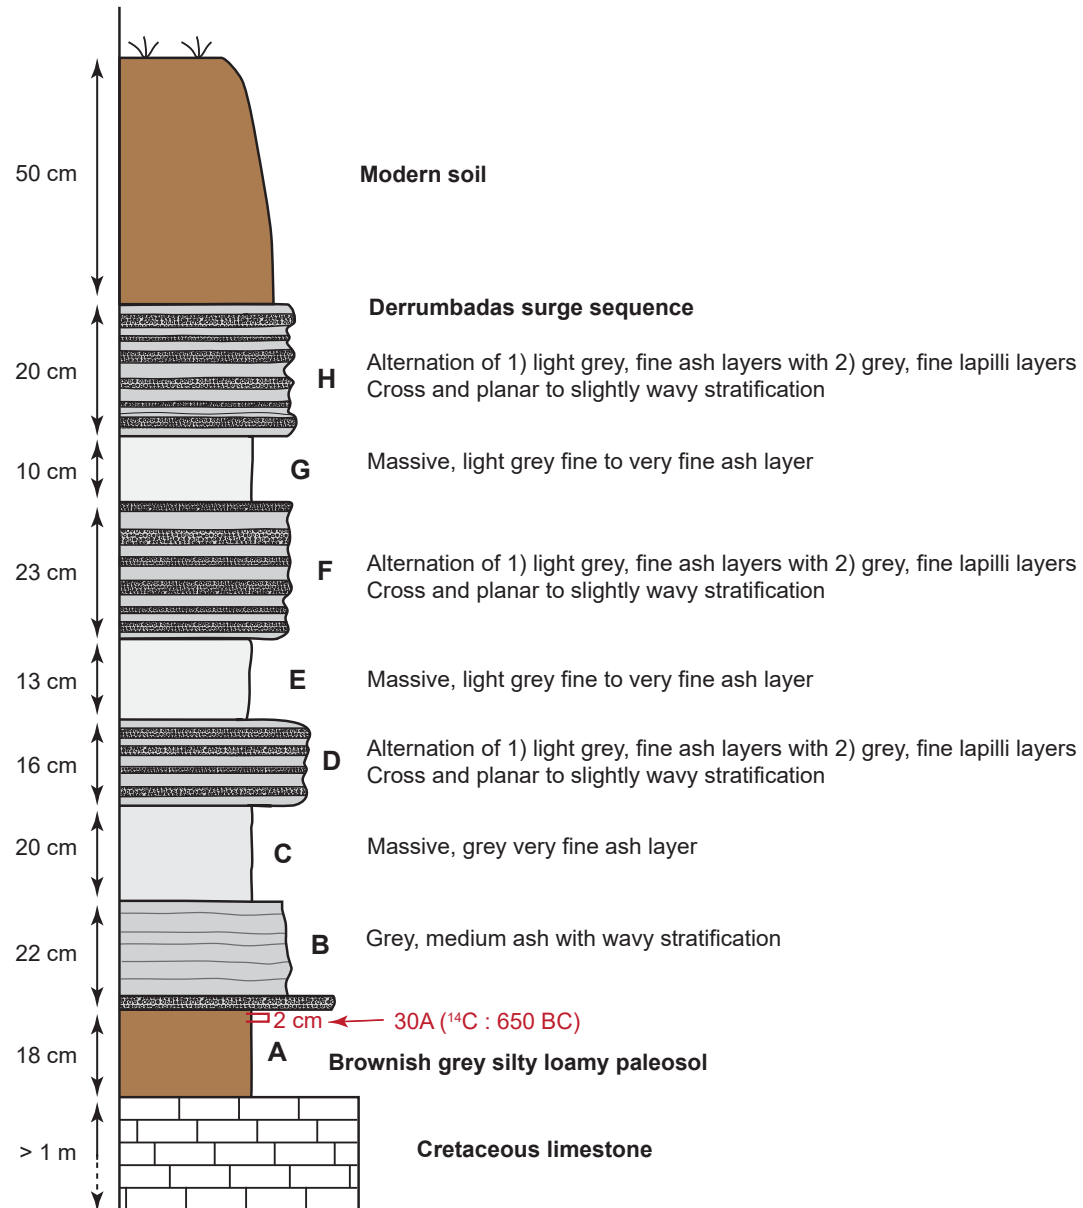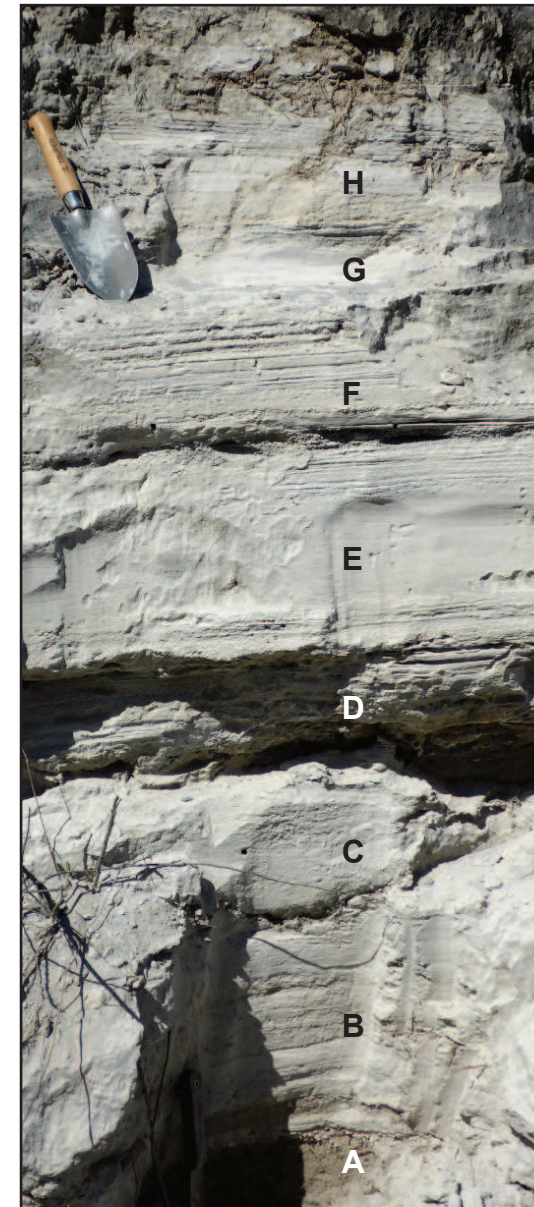



**Site 32 (along Motorway to Puebla)**

N 19° 24.627'  
W 097° 39.392'  
2426 m

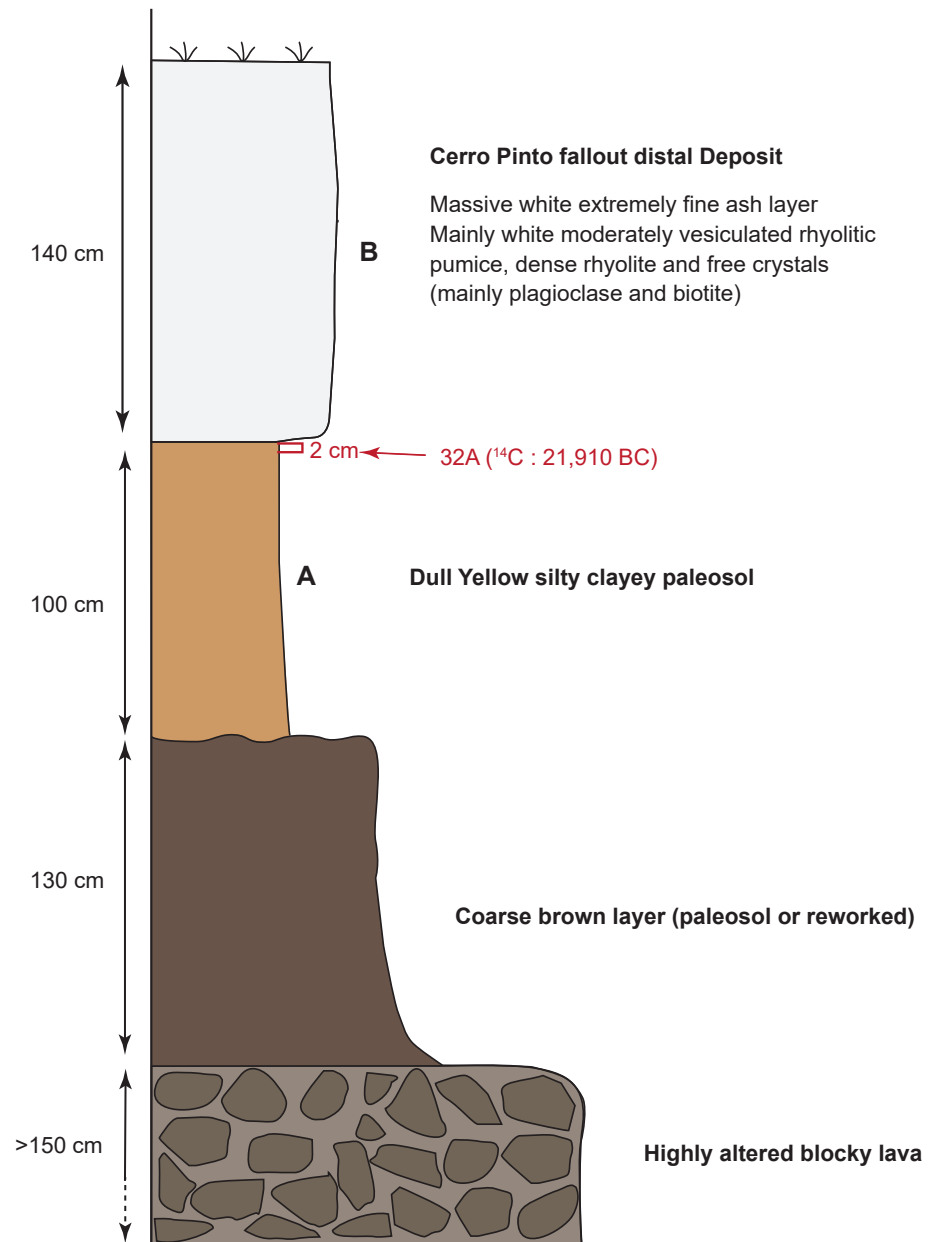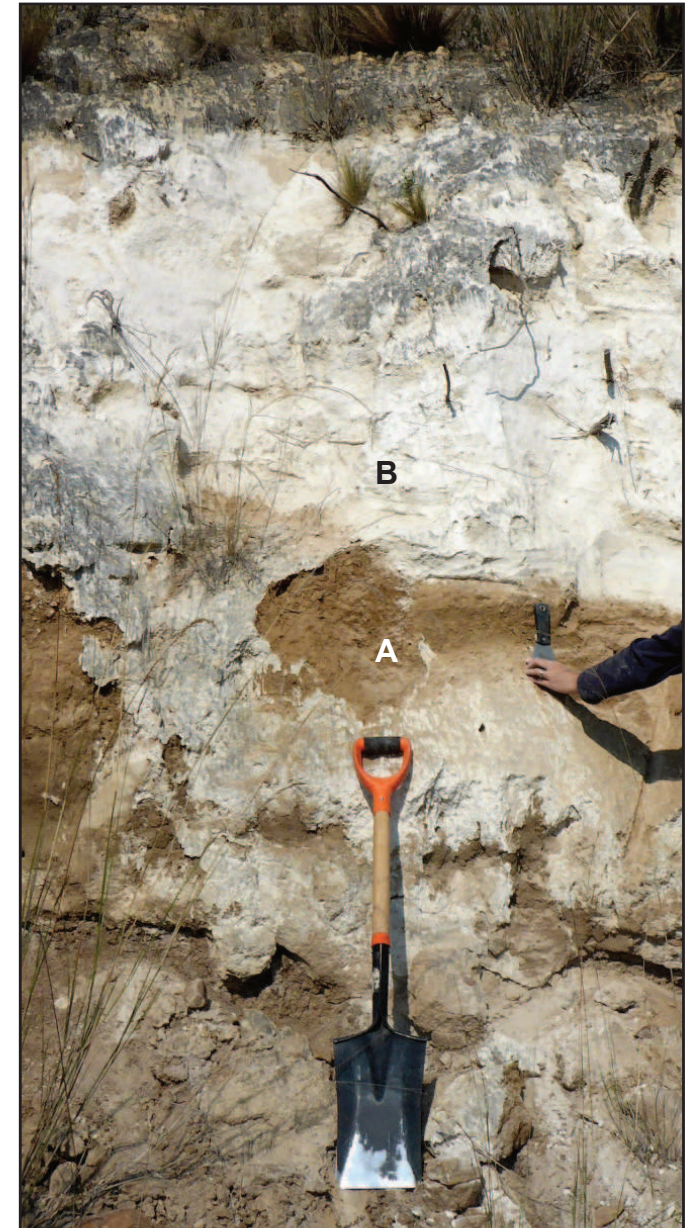

## Site 33 (Guadalupe Victoria)

N 19° 17.065'  
W 097° 20.840'  
2442 m

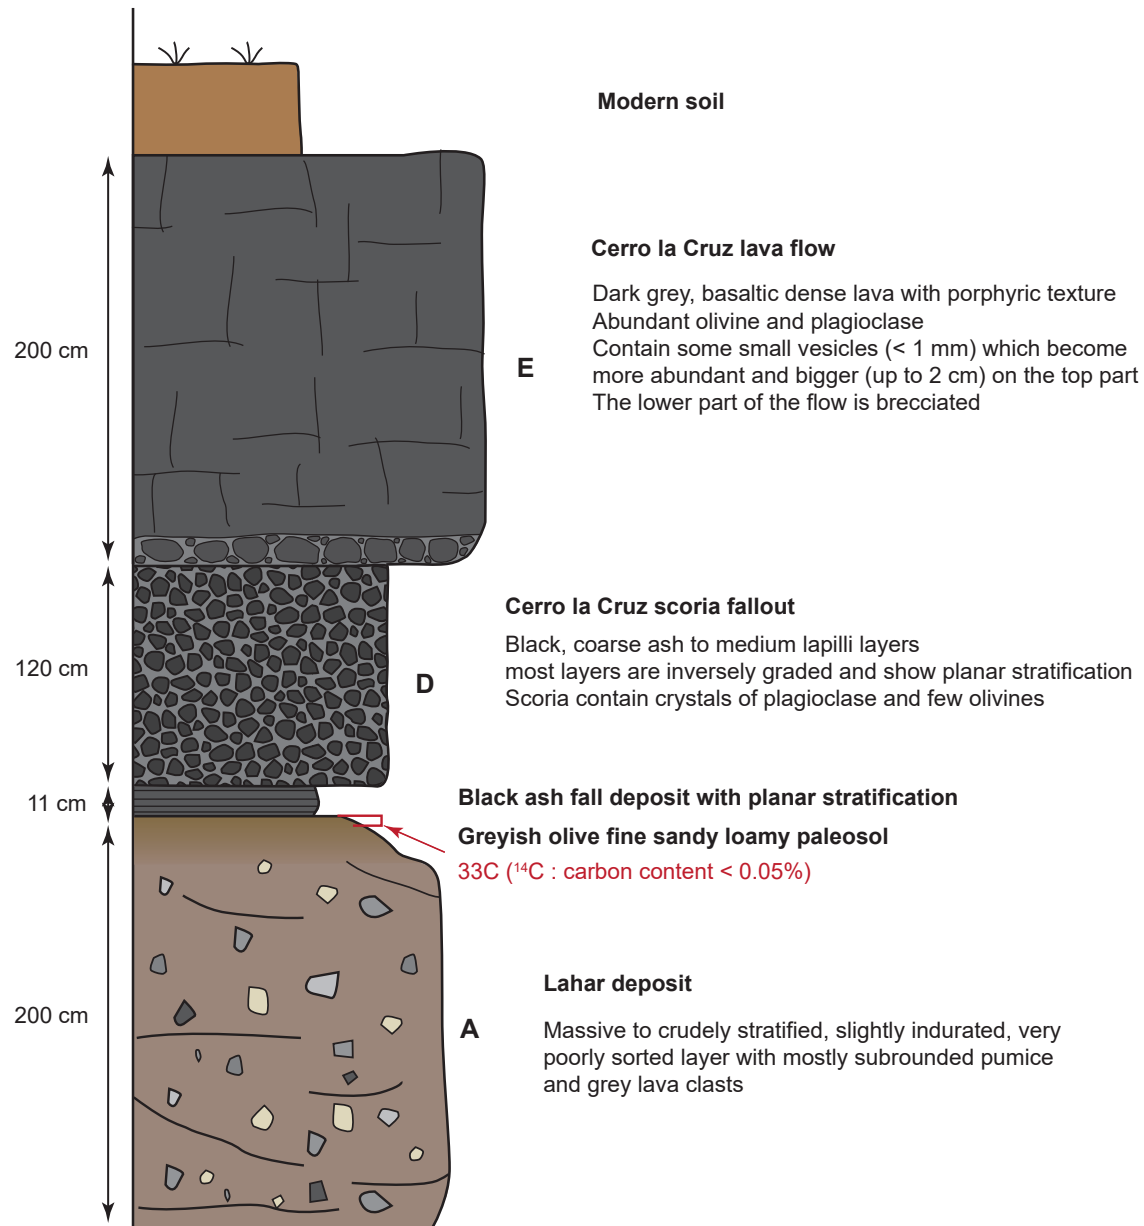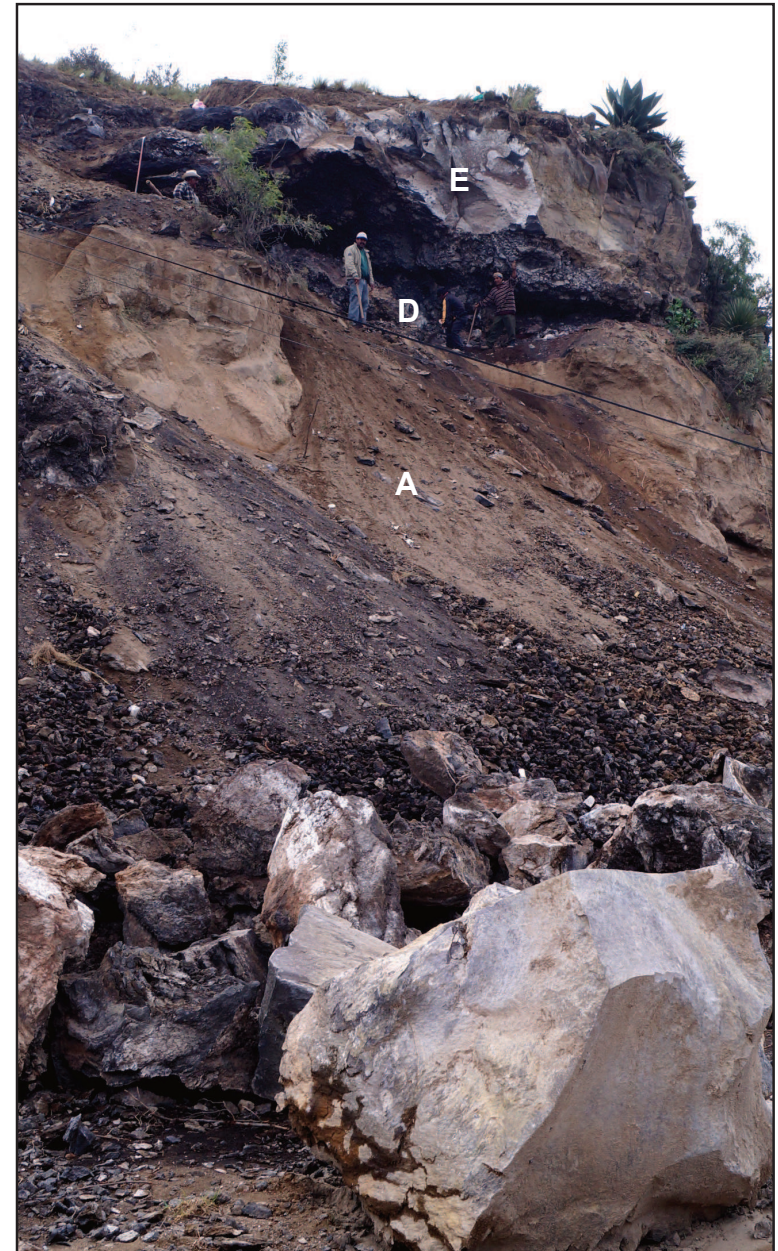



## Site 34 (Guadalupe Victoria)

N 19° 17.140'  
W 097° 20.811'  
2444 m

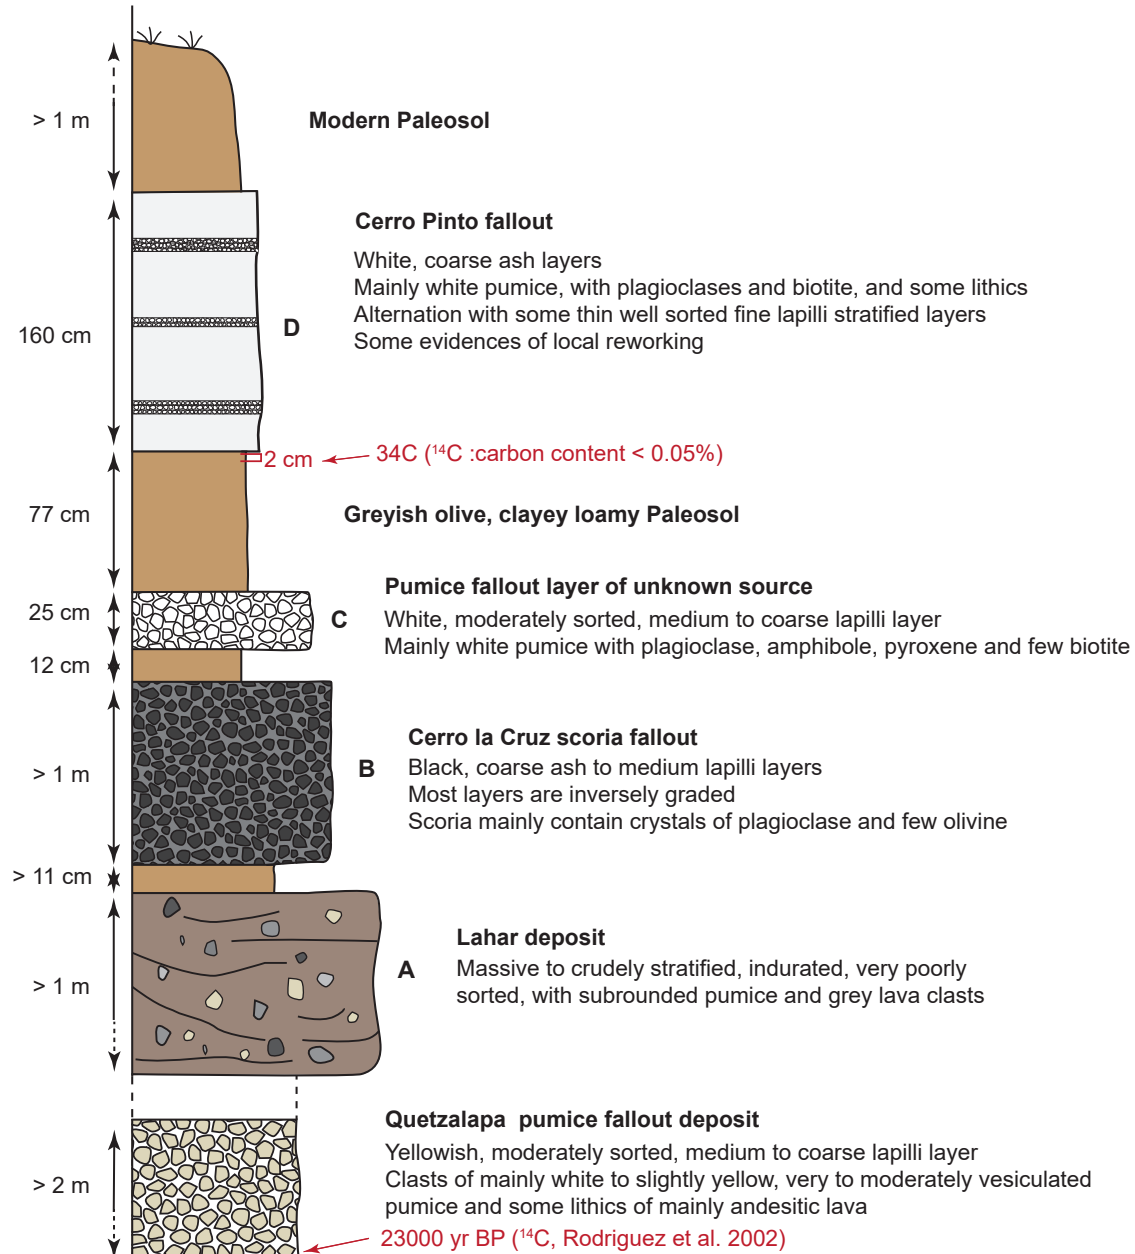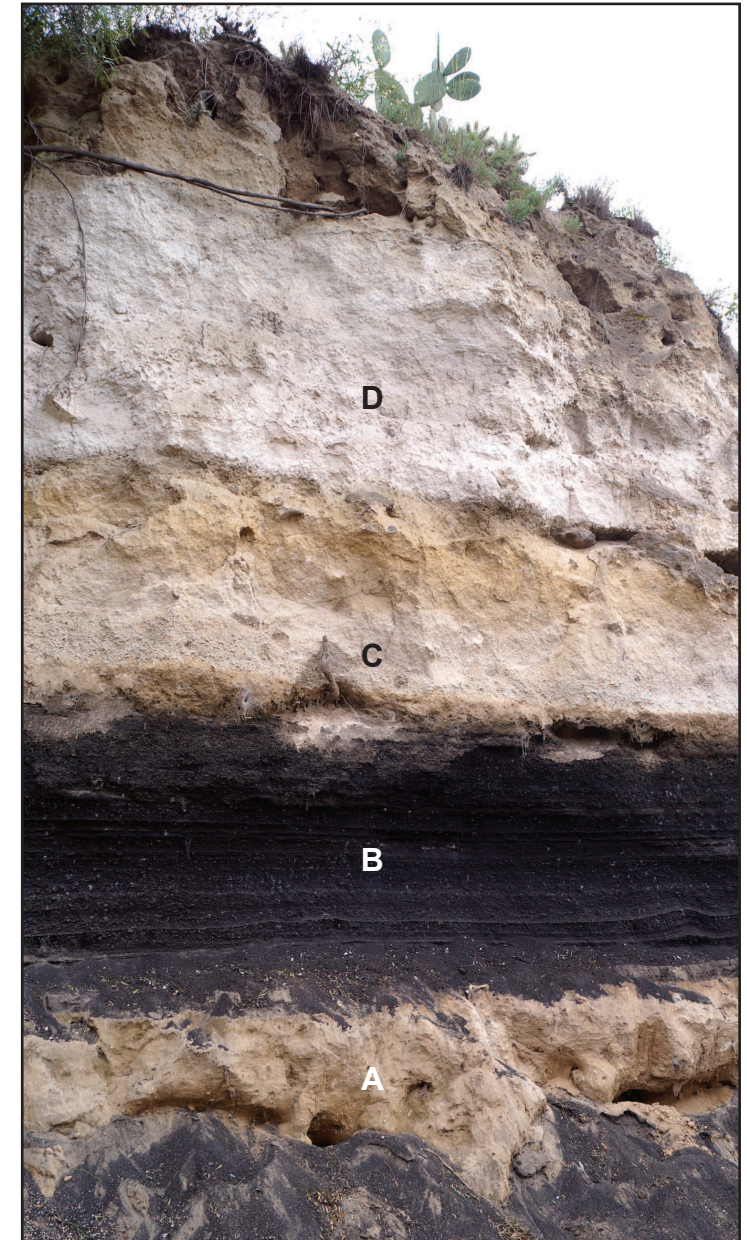

### Site 35 (SW of Guadalupe Victoria)

N 19° 17.000'  
W 097° 20.965'  
2448 m

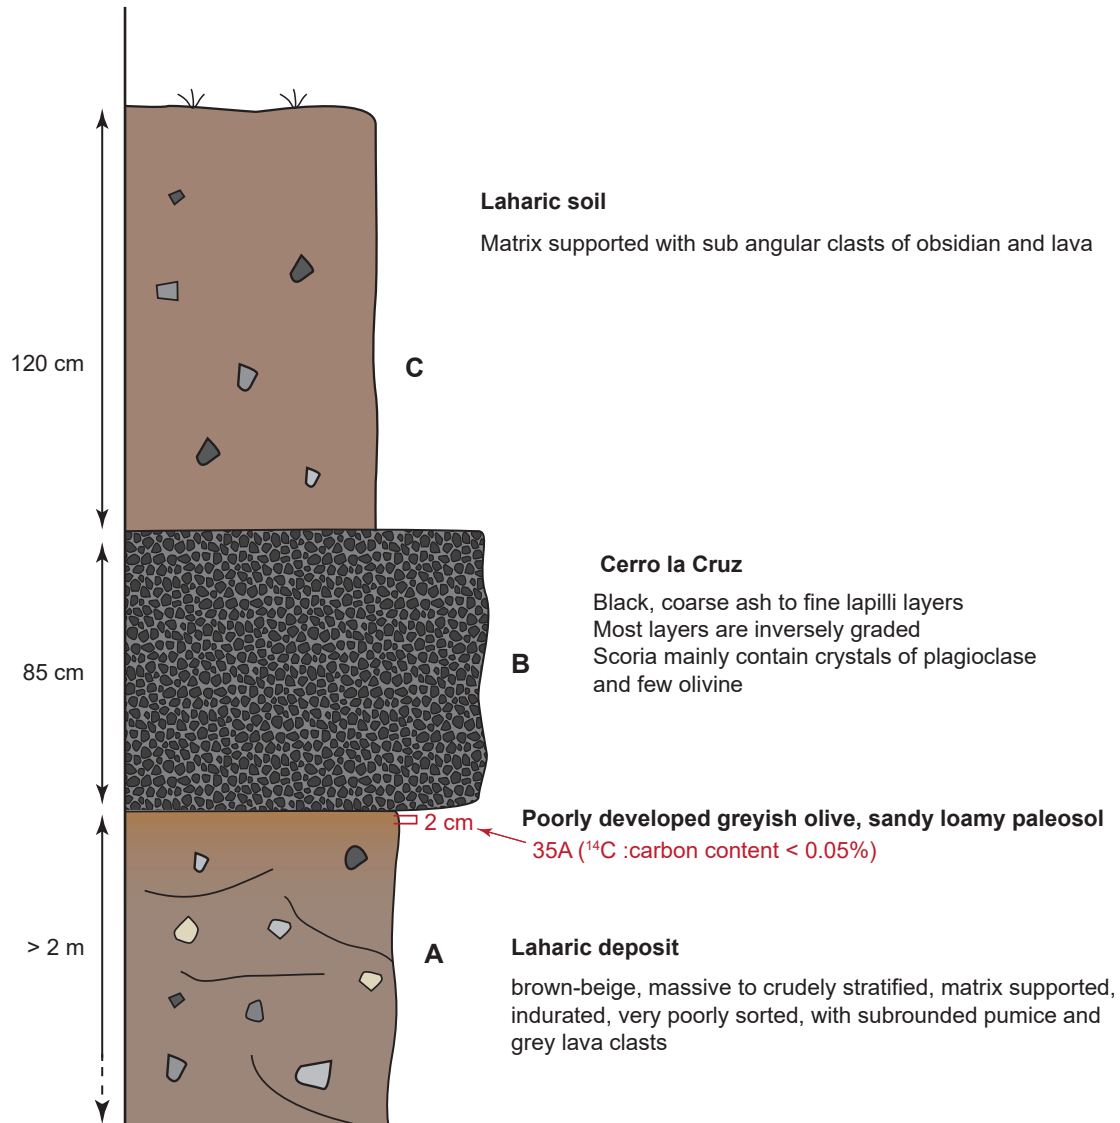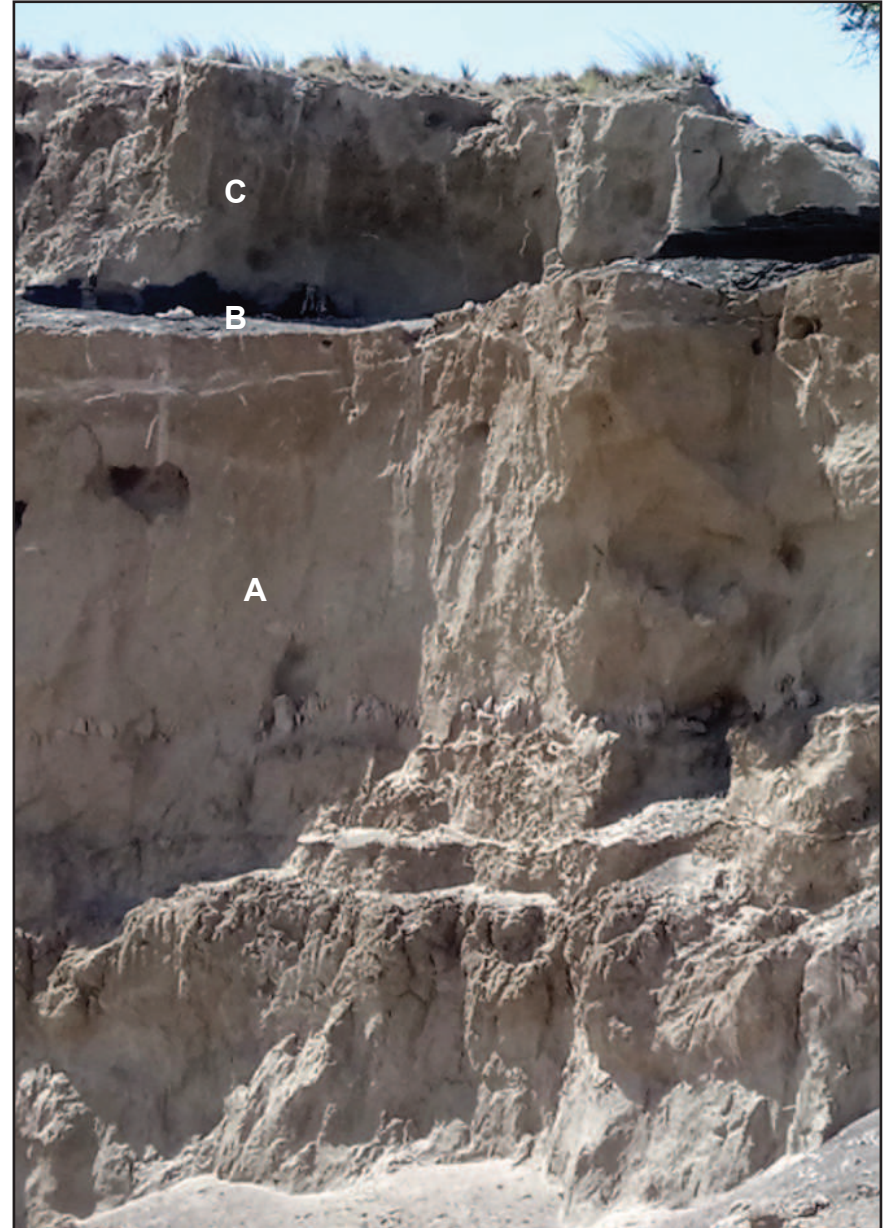



## Site 46 (Jalapasquillo 1)

N 19° 26.037'  
W 097° 30.458'  
2345 m

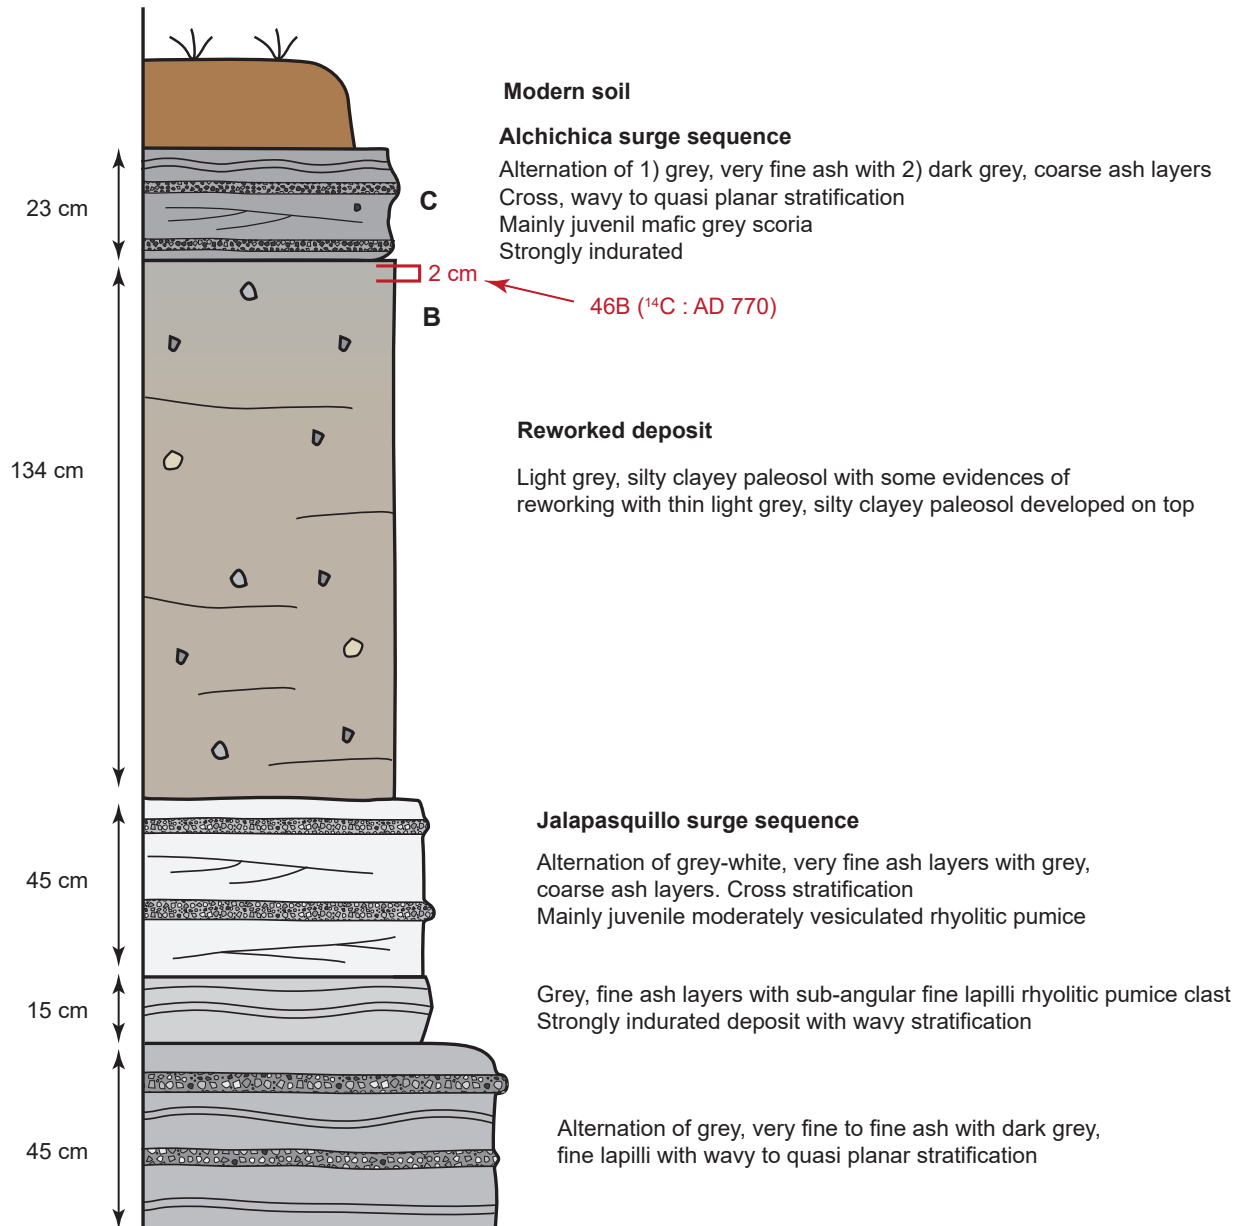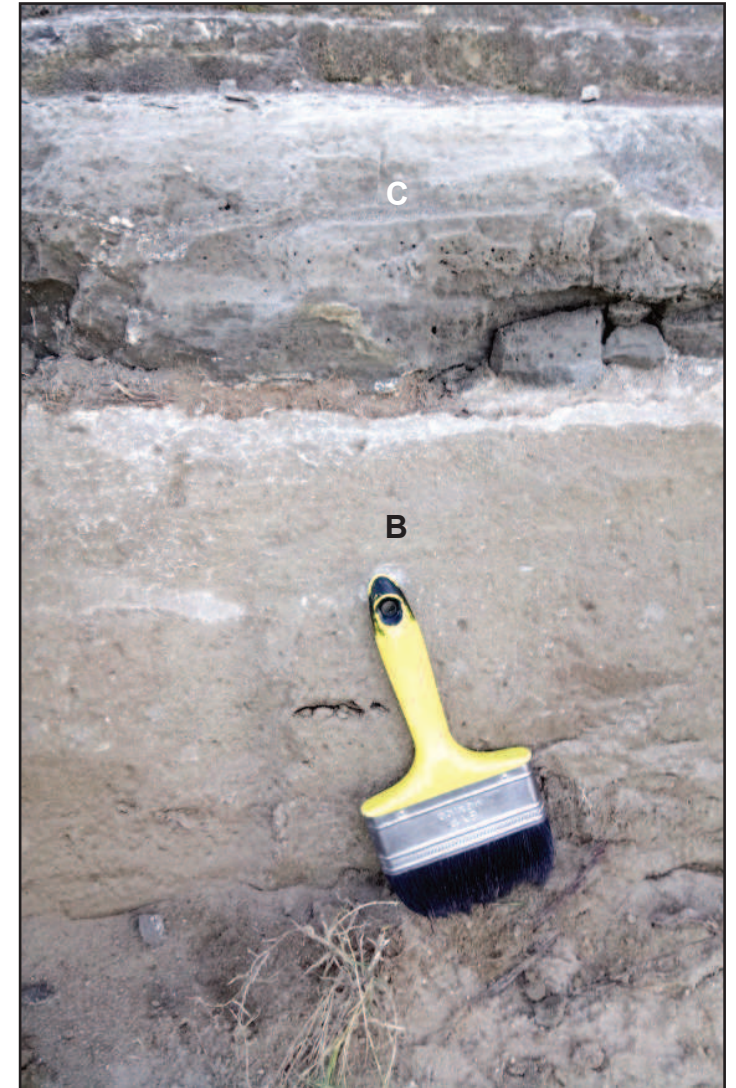

**Site 47 (south of Cerro Pizarro)**

N 19° 28.705'  
W 097° 26.811'  
2347 m

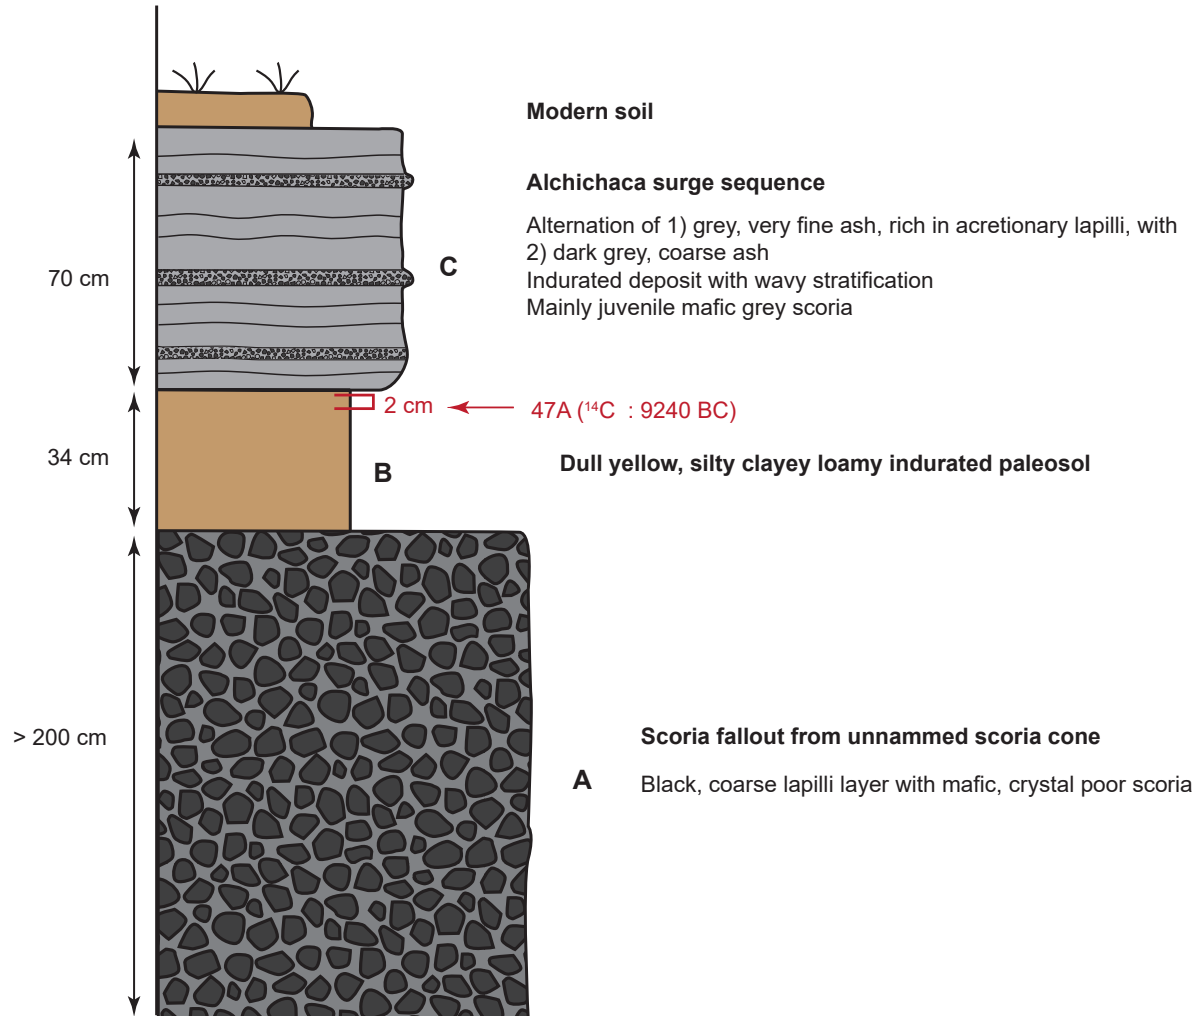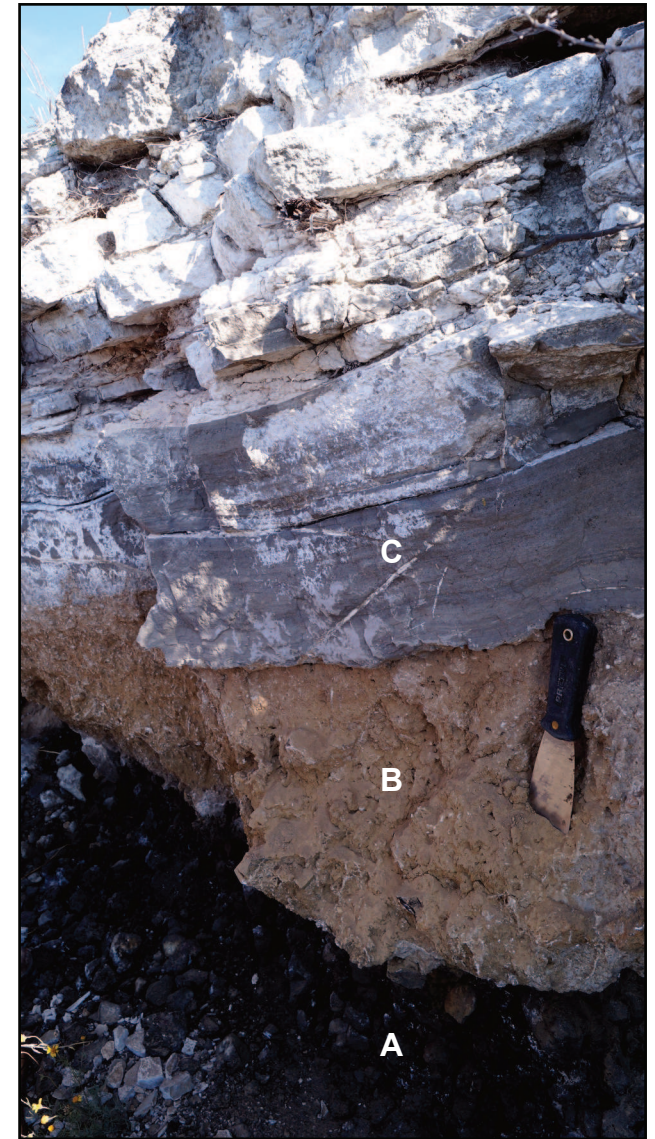



## Site 66 (West flank of las Aguilas)

N 19° 20.133'  
W 097° 26.089'  
2526 m

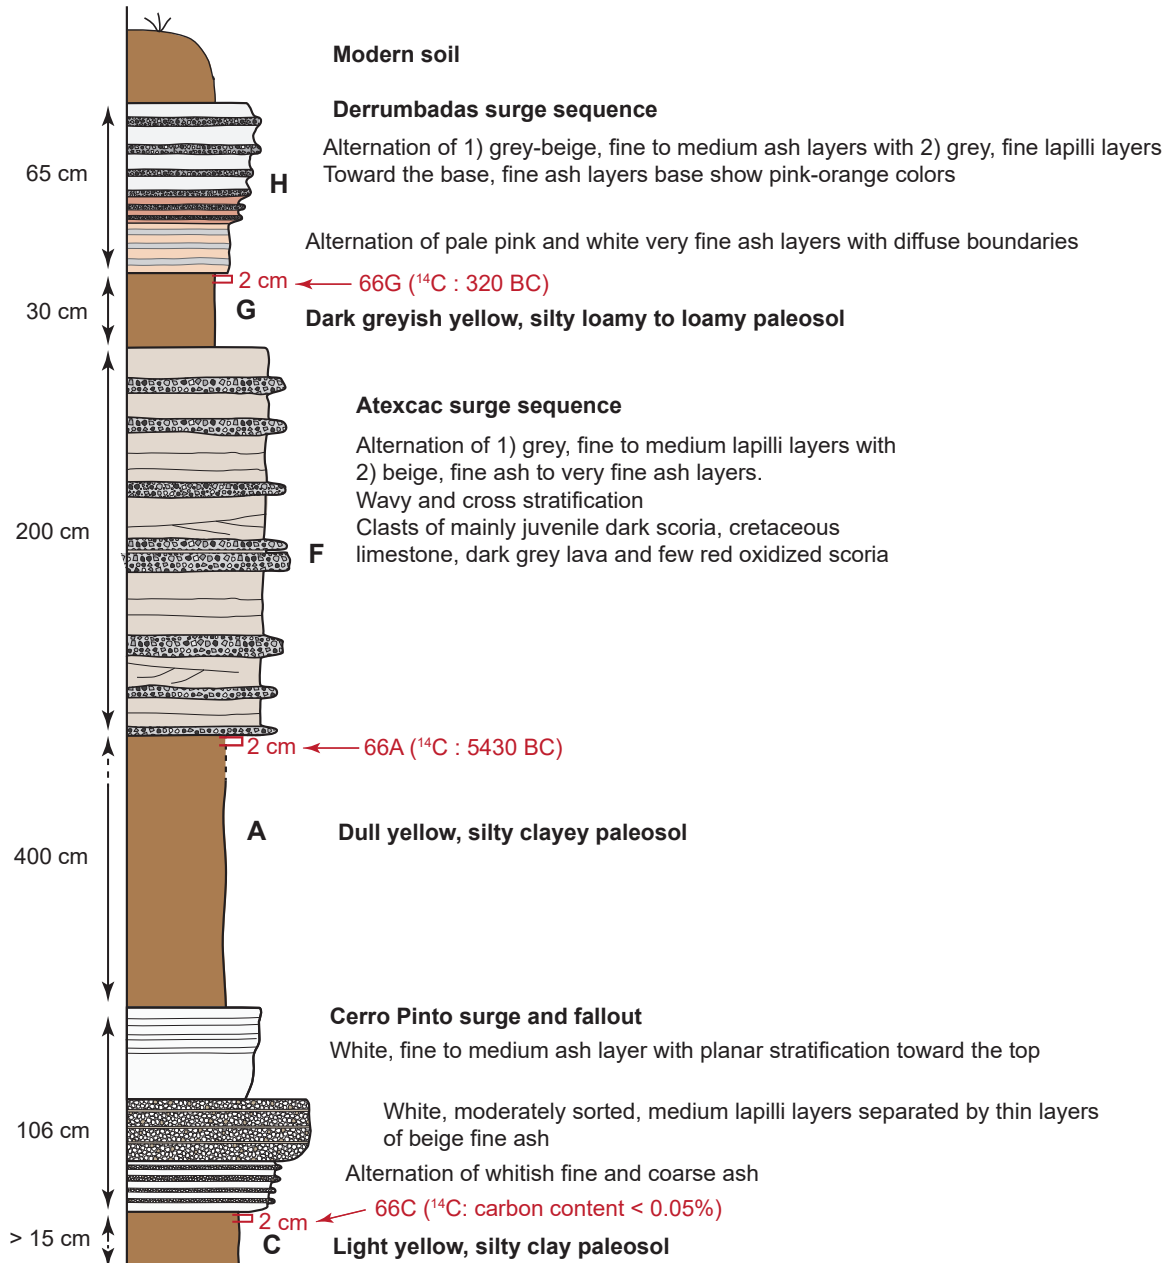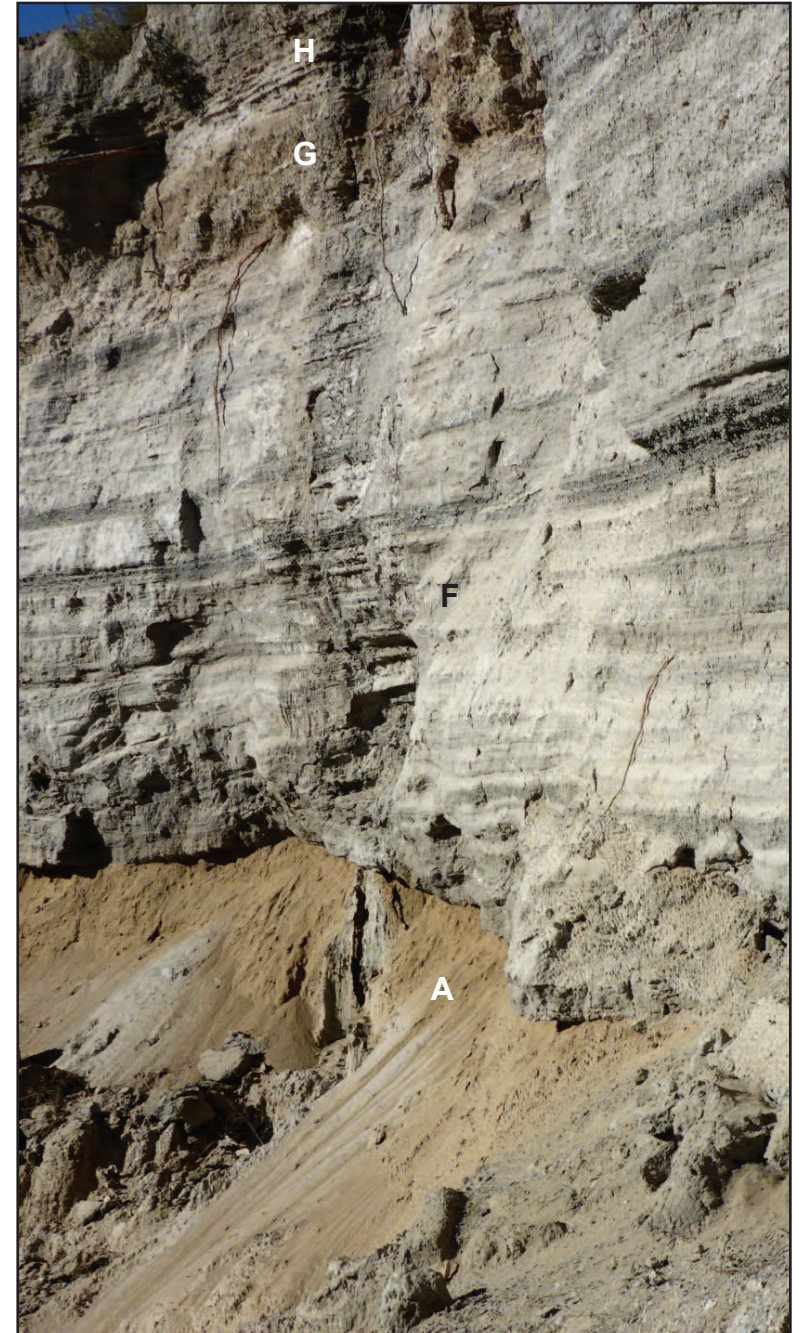

## Site 67 (E of Tepetitlàn)

N 19° 11.616'  
W 097° 25.607'  
2437 m

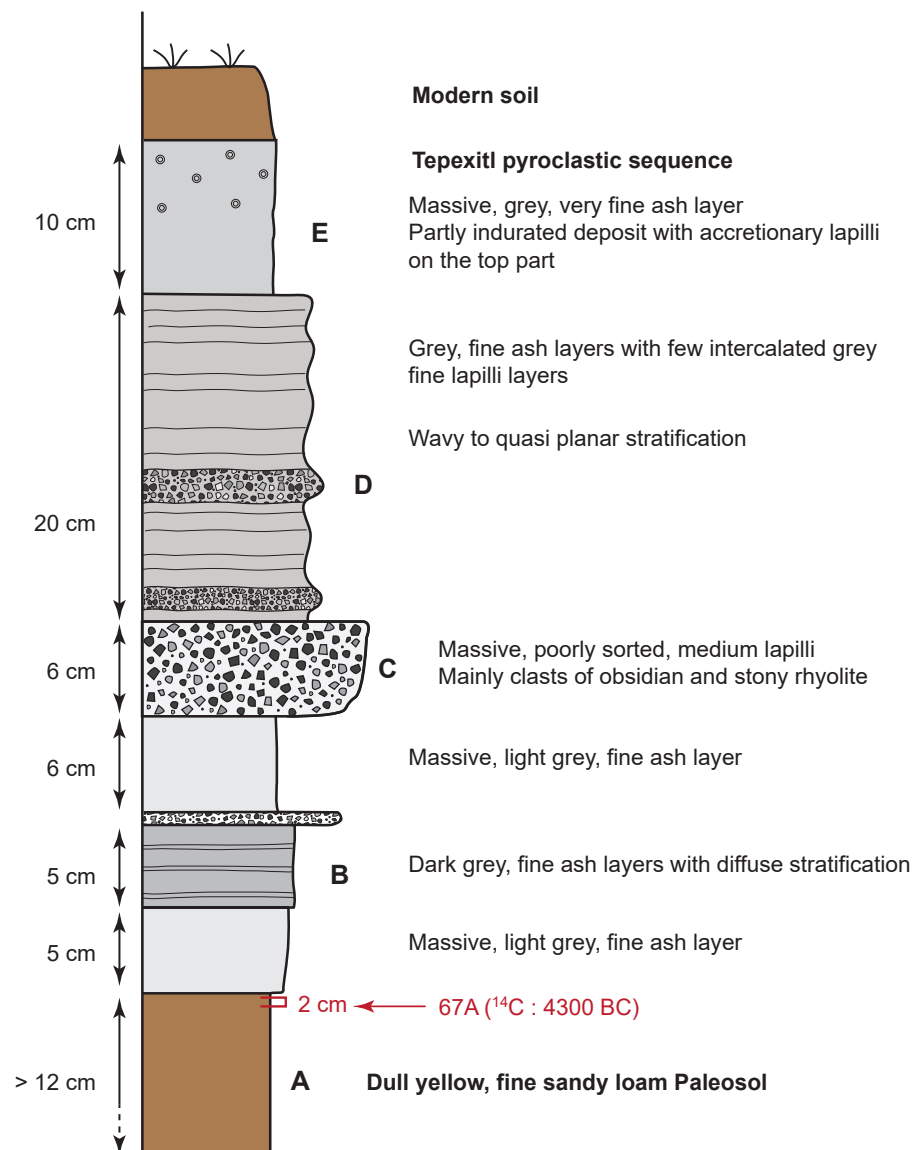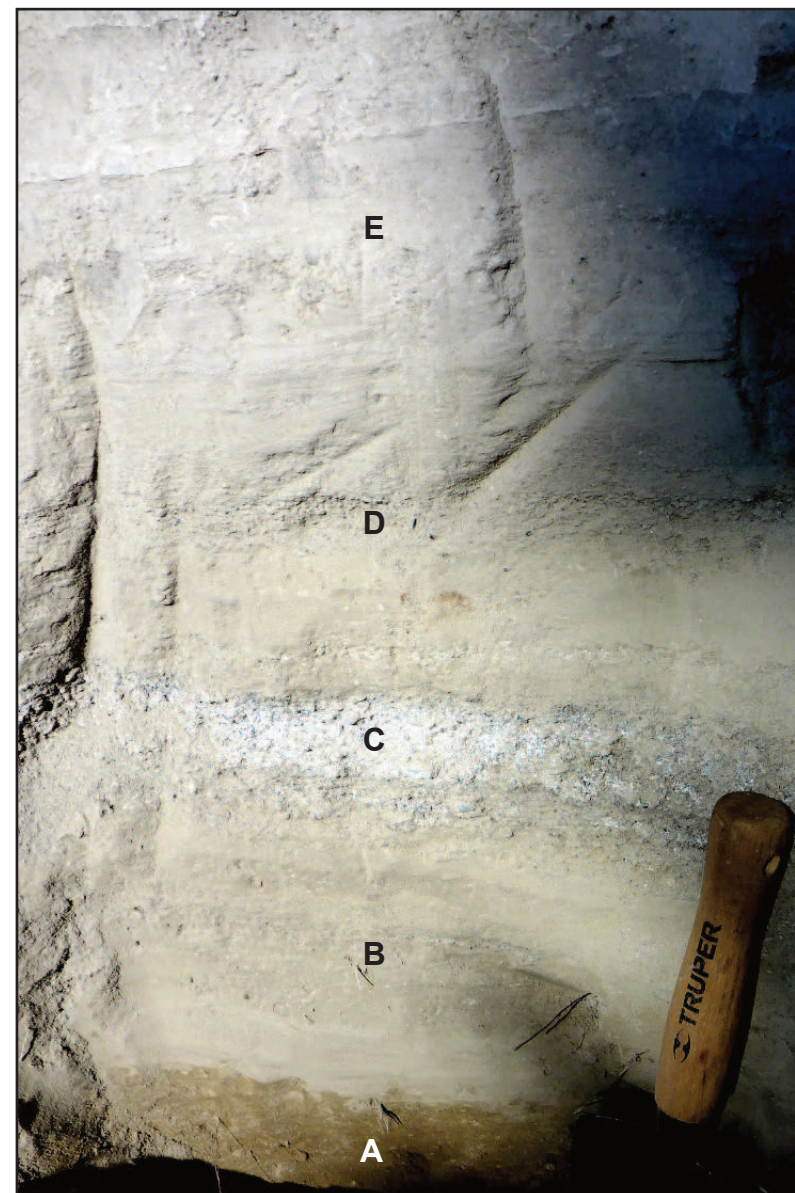



## Site 68 (hummock E of las Derrumbadas)

N 19° 17.156'  
W 097° 25.032"  
2439 m

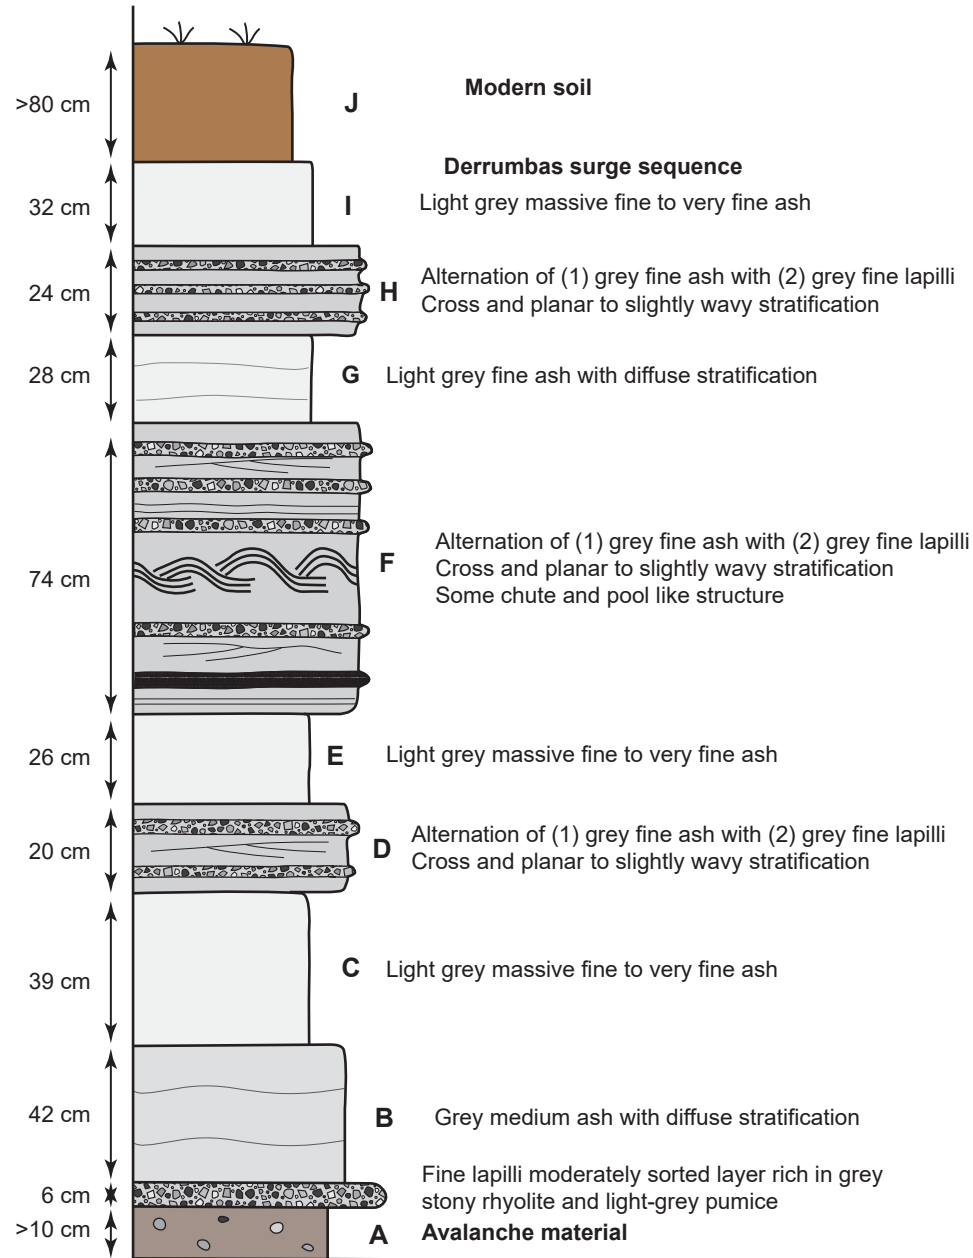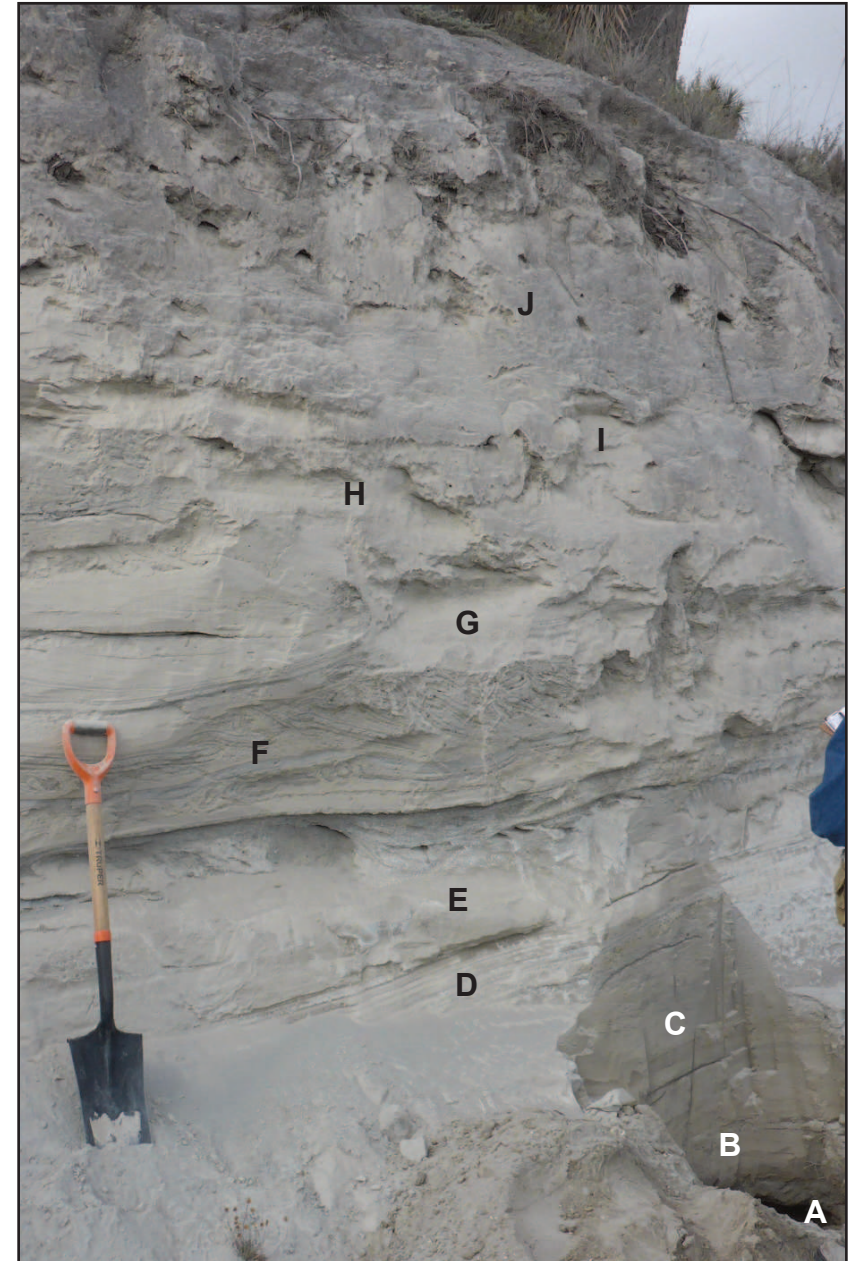

# Site 71 (NW Venustiano Carranza)

N 19° 13.936'  
W 097° 28.839'  
2403 m

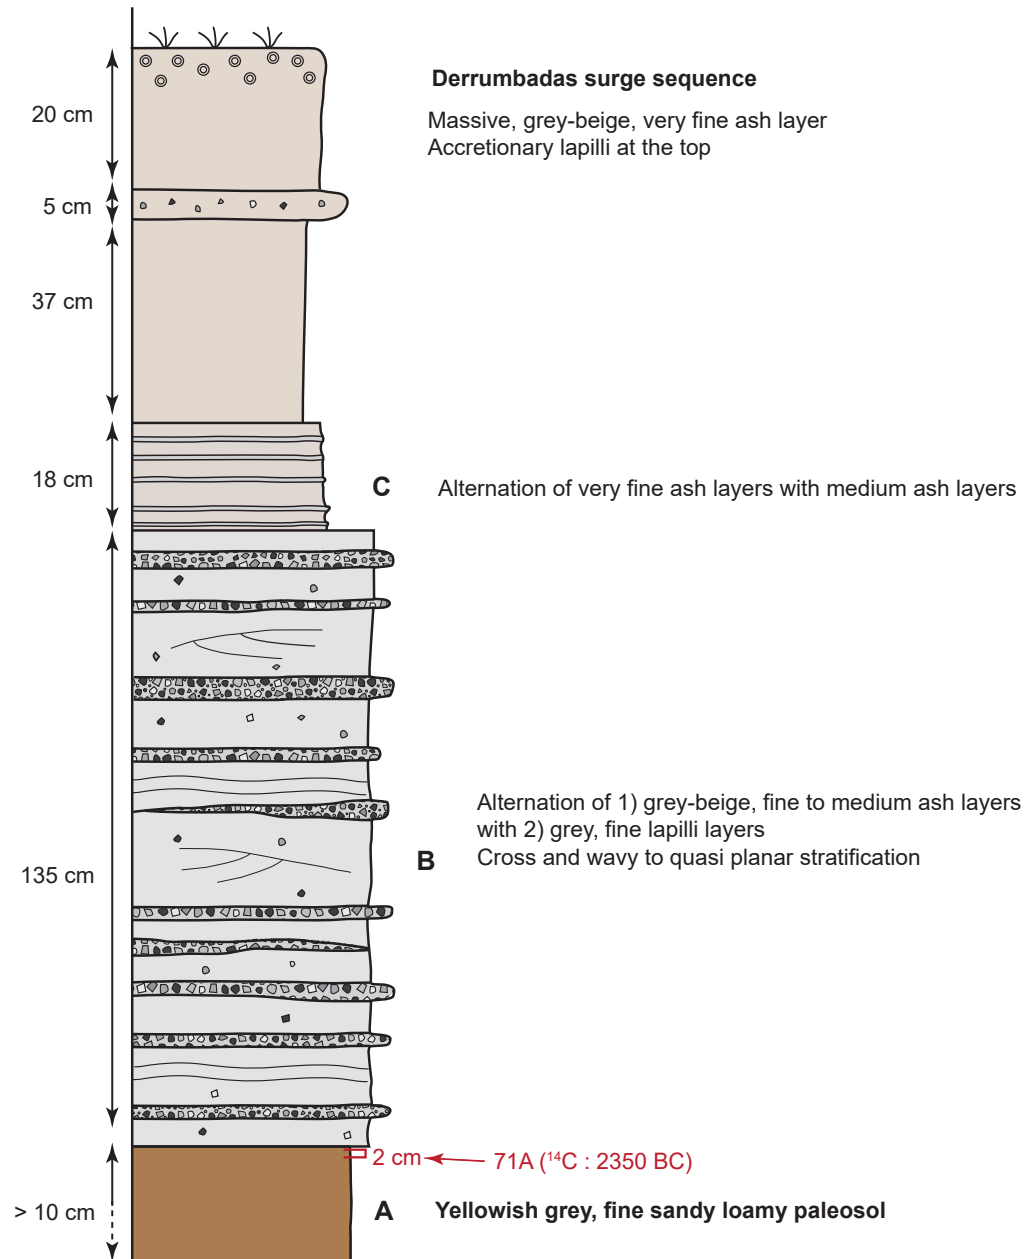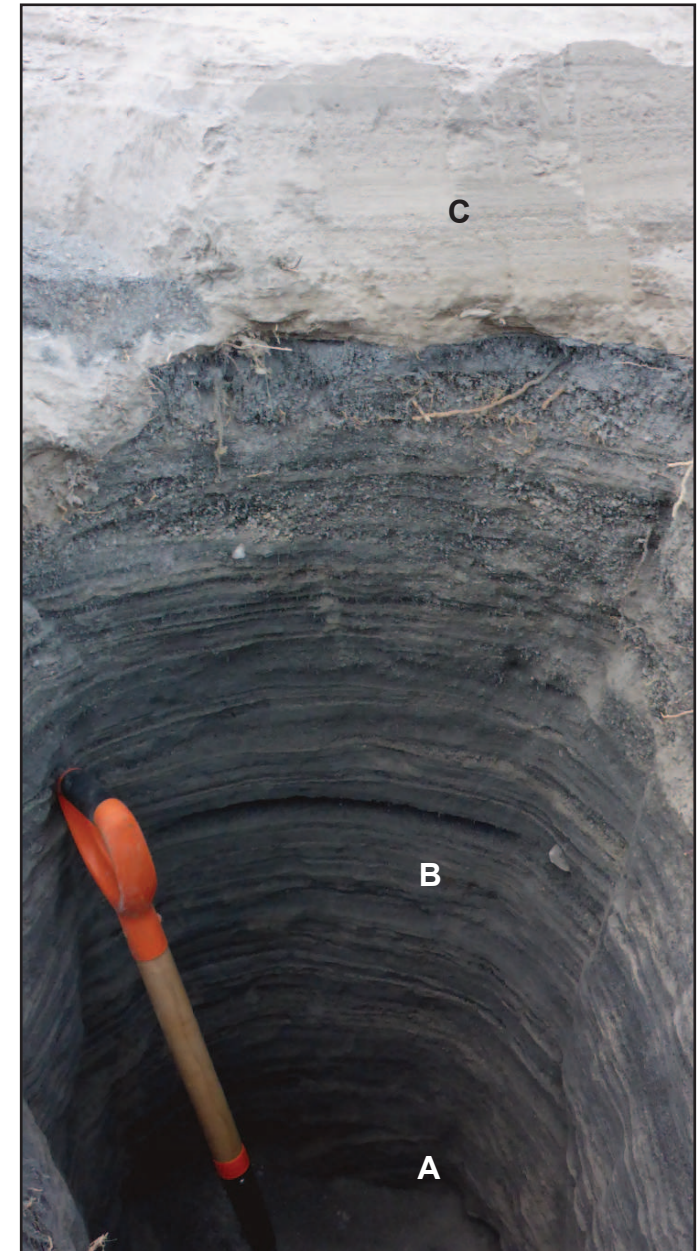



## Site 90 (Aljojuca inner crater wall)

N 19° 05.382'  
W 097° 32.294'  
2439 m

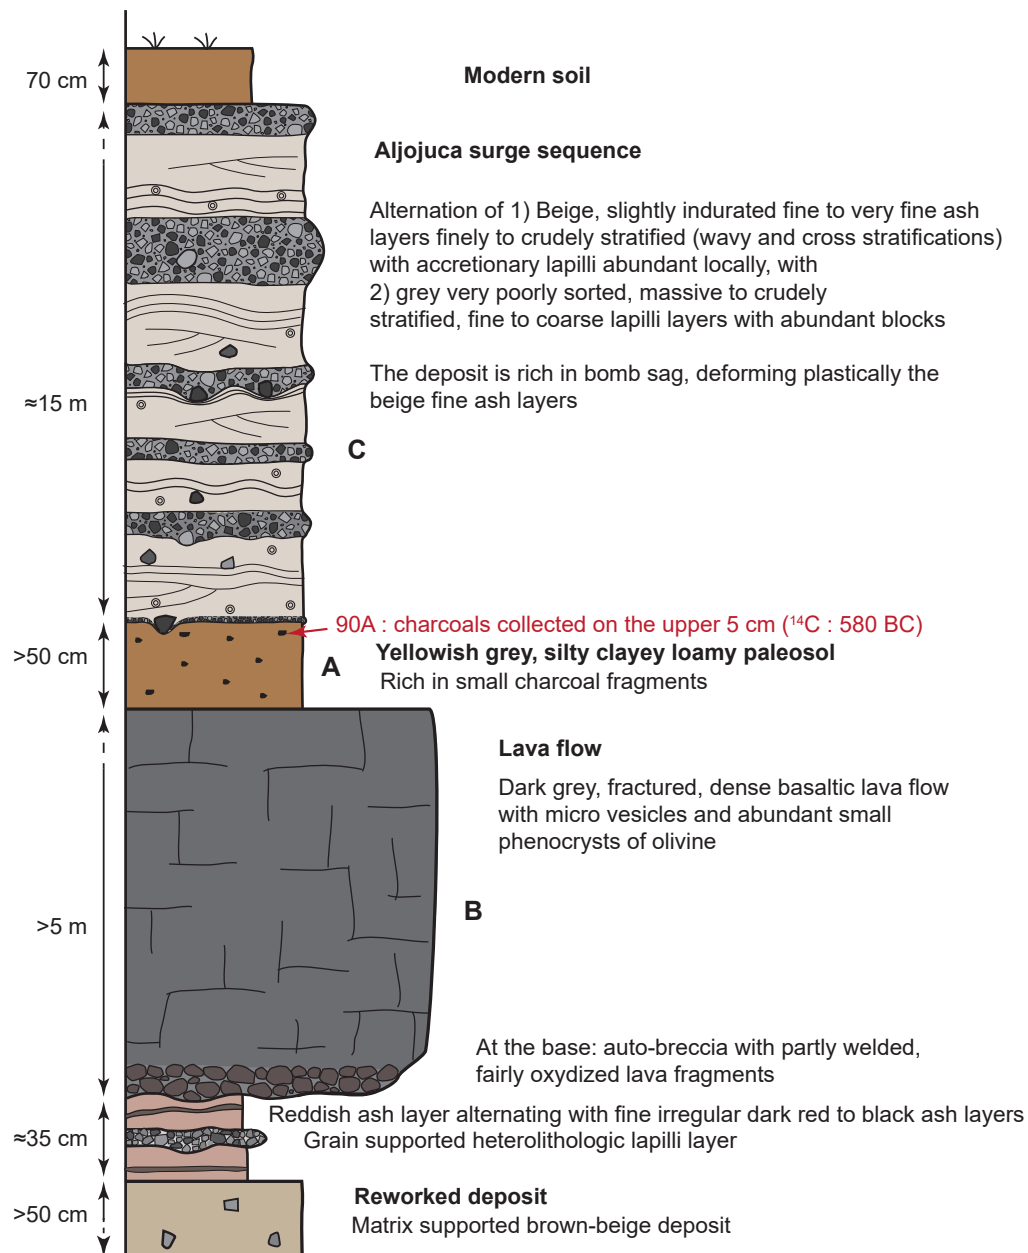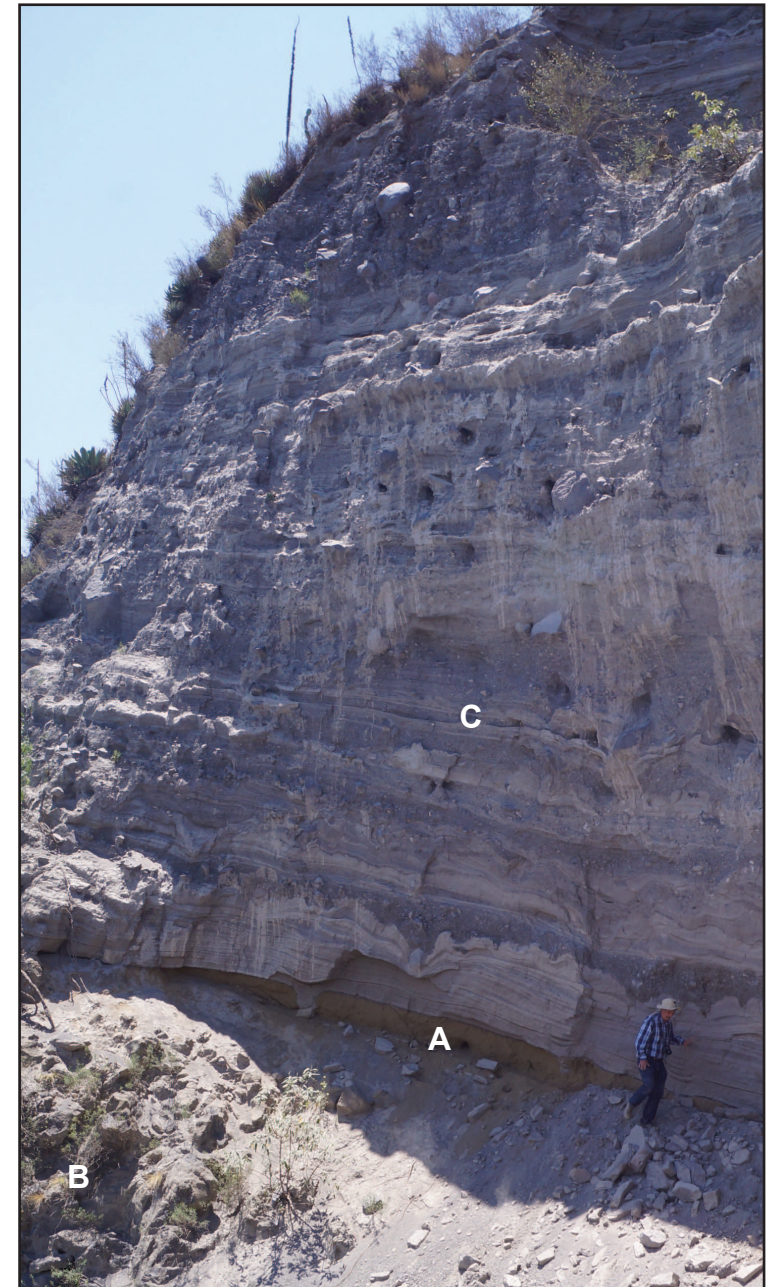

## Site 93 (Tecuítlapa)

N 19° 07.312'  
W 097° 32.622'  
2388 m

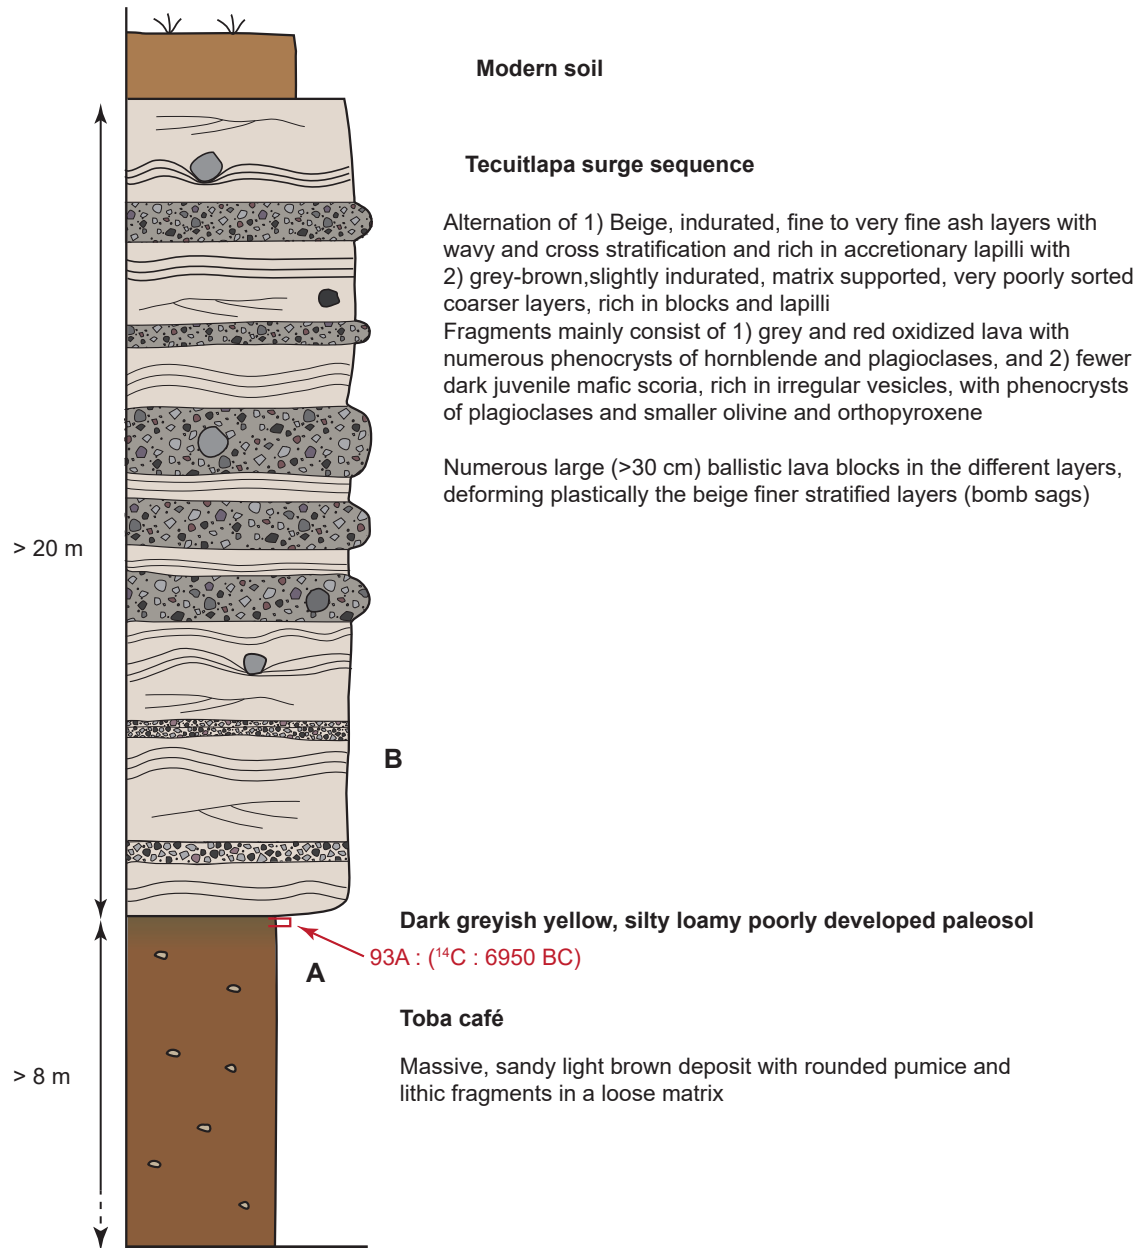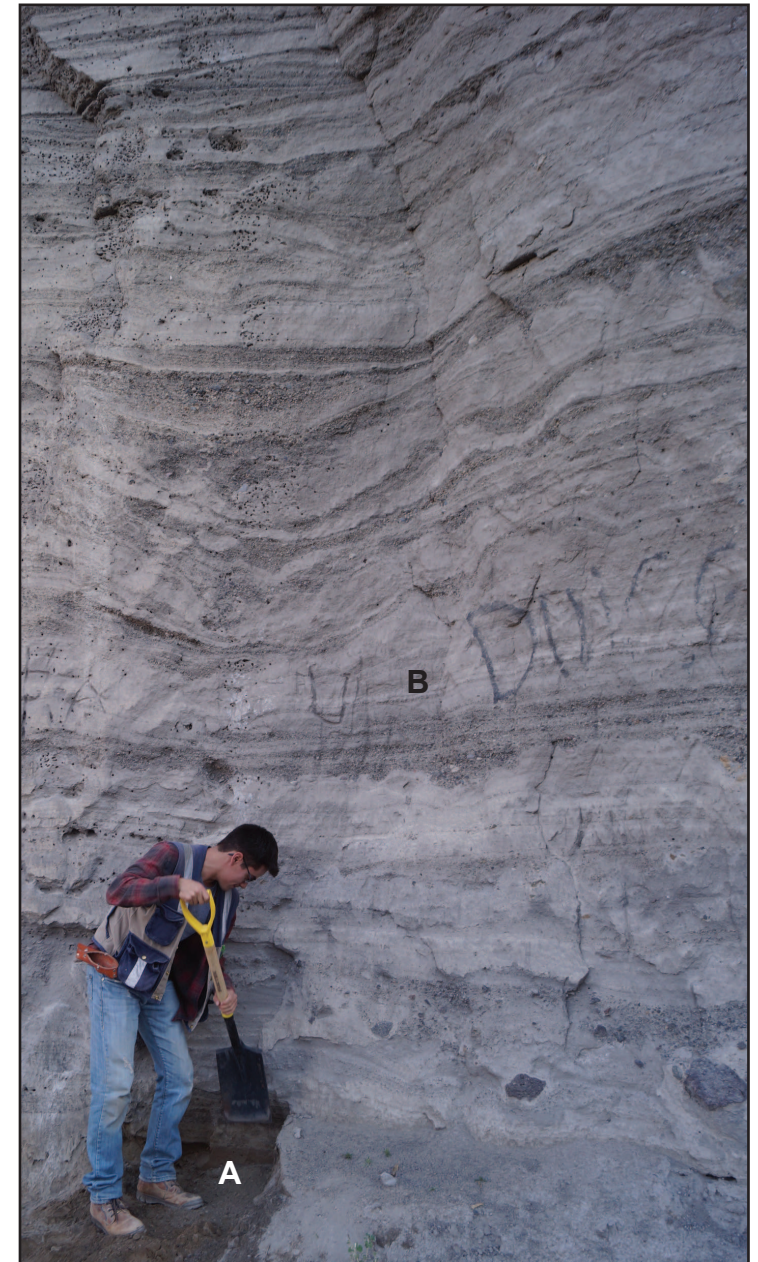



## Site 96 (Cerro Pizarro debris avalanche)

N 19° 17.065'  
W 097° 20.840'  
2442 m

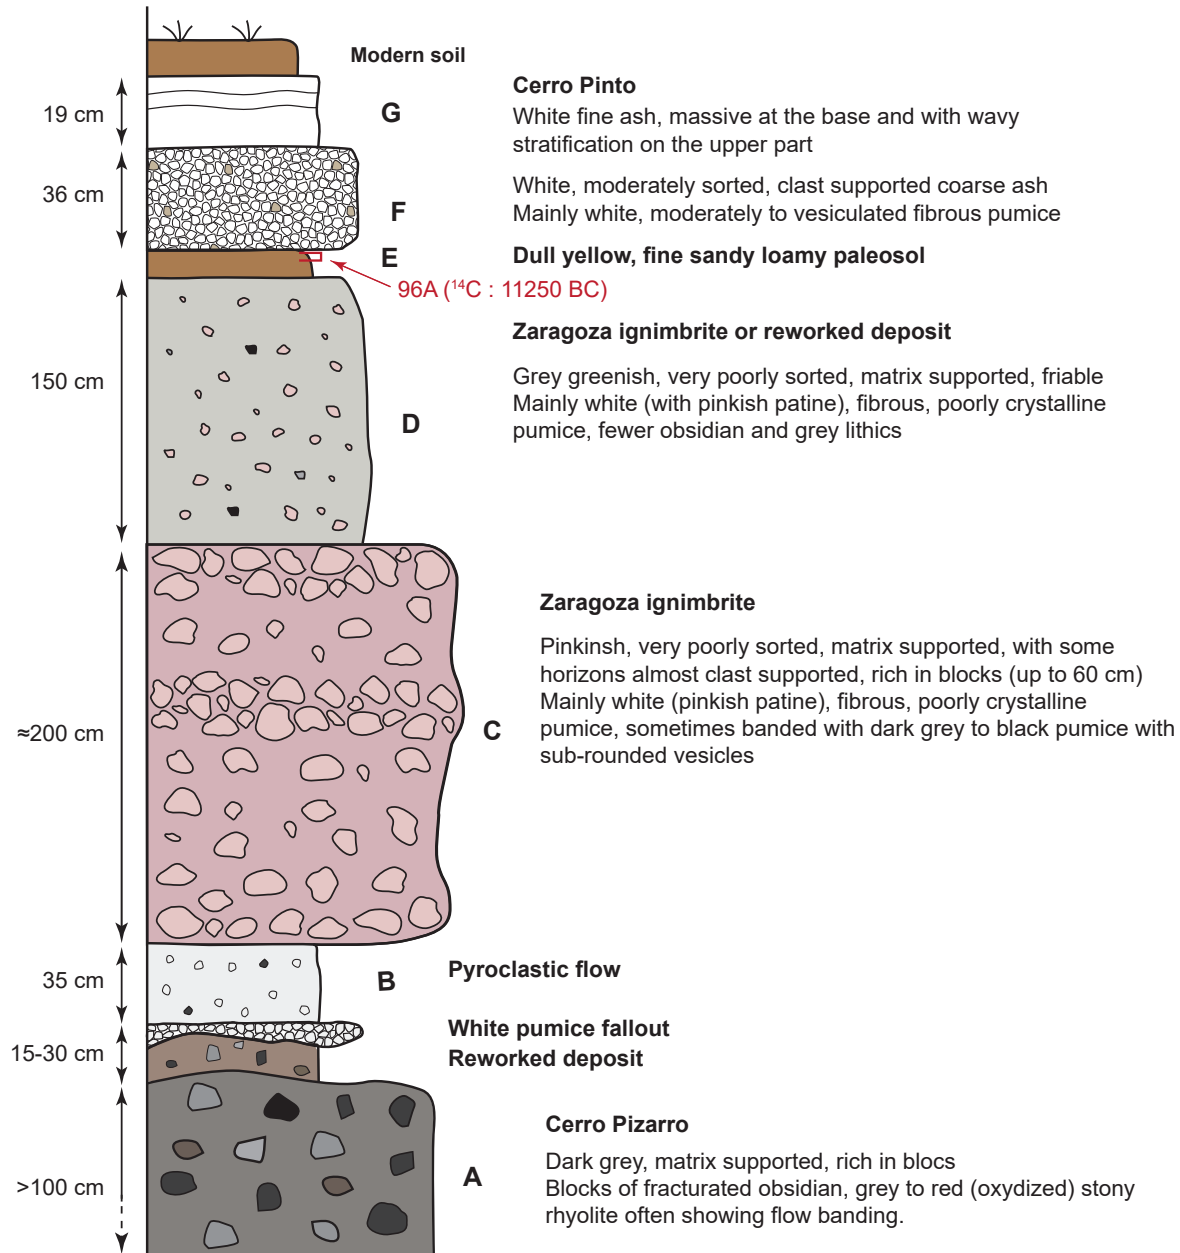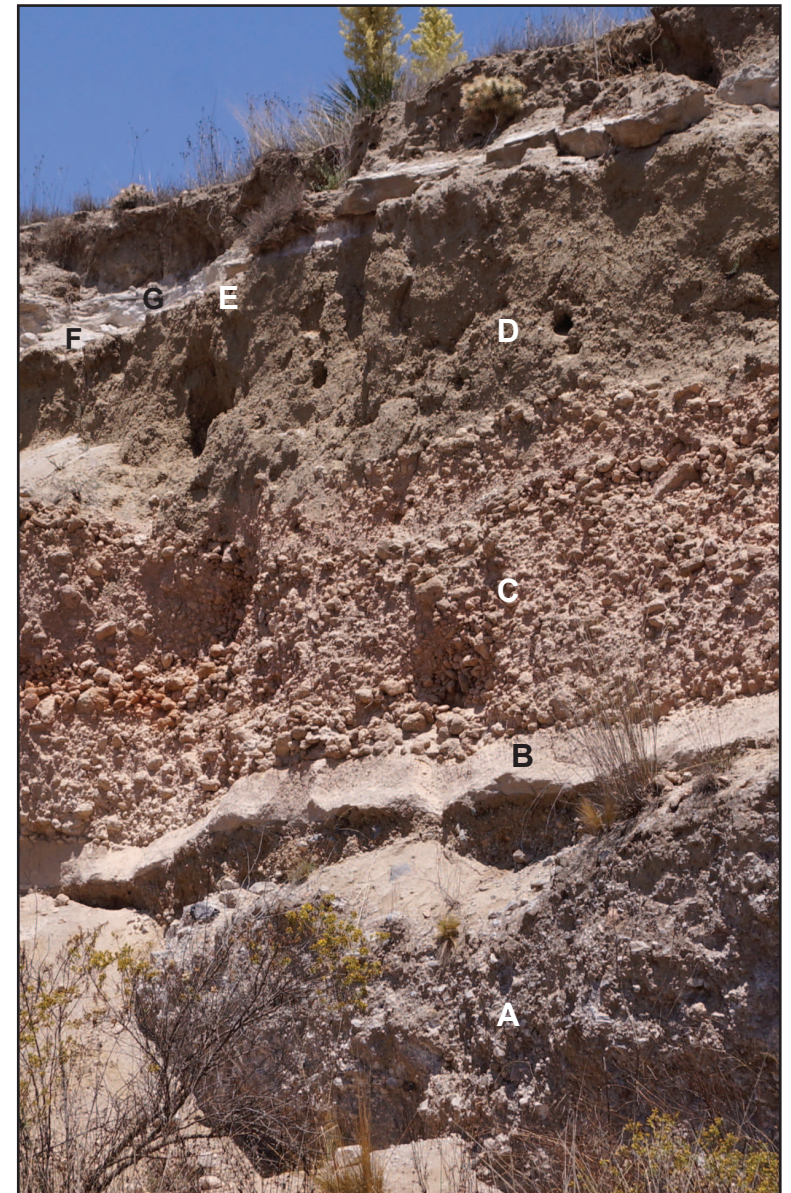



## Site 102 (SSE of Cerro Pinto)

N 19° 20.784"  
W 097° 28.988'  
2495 m

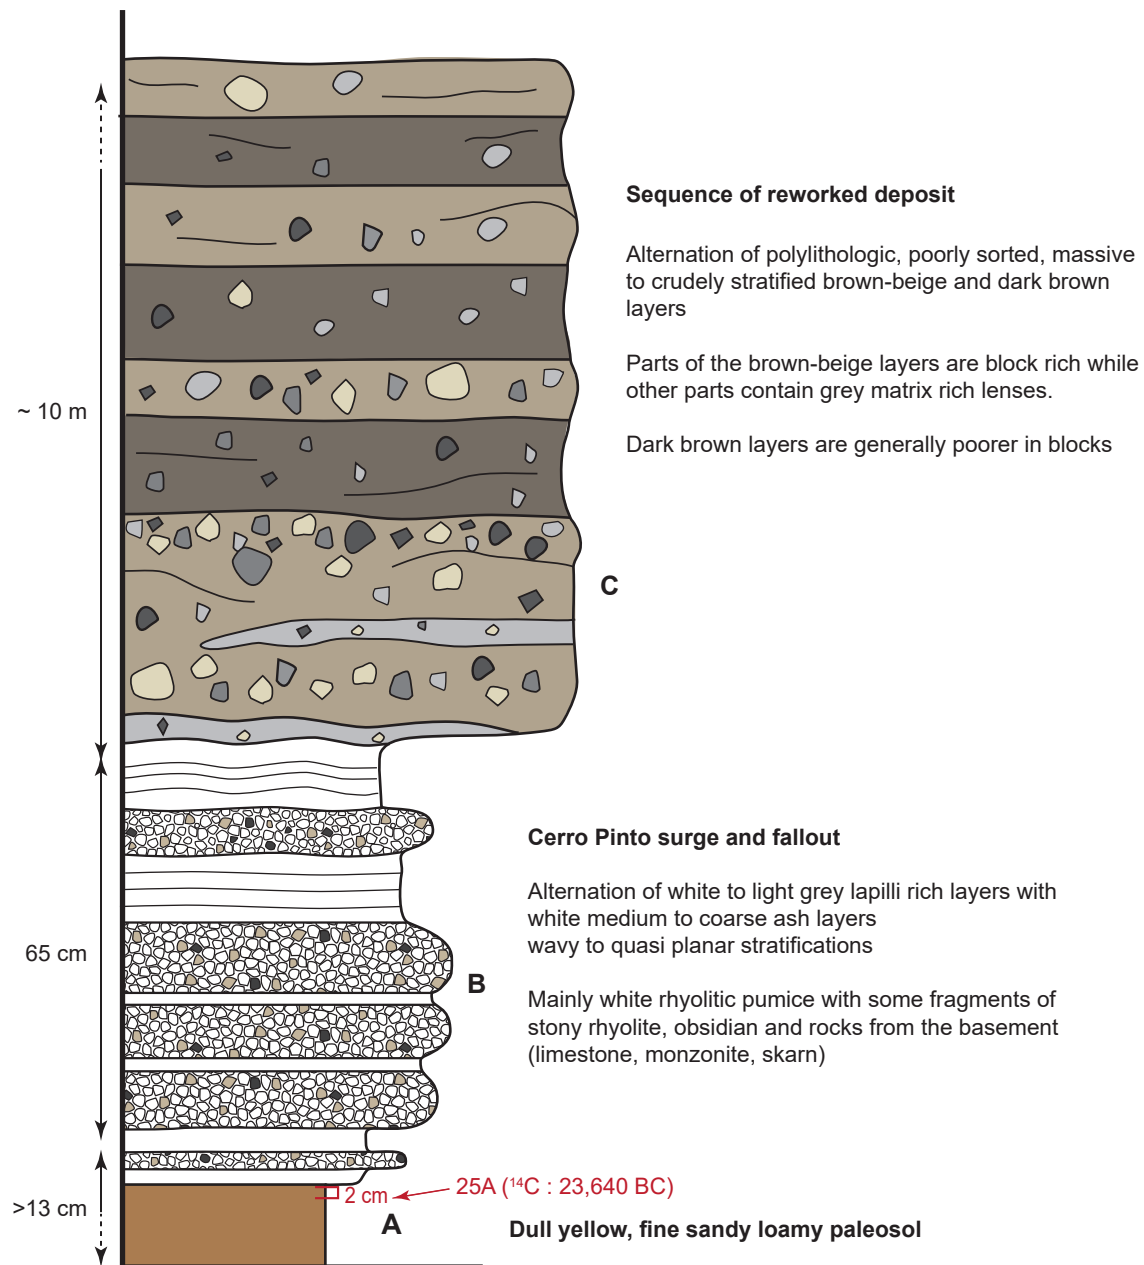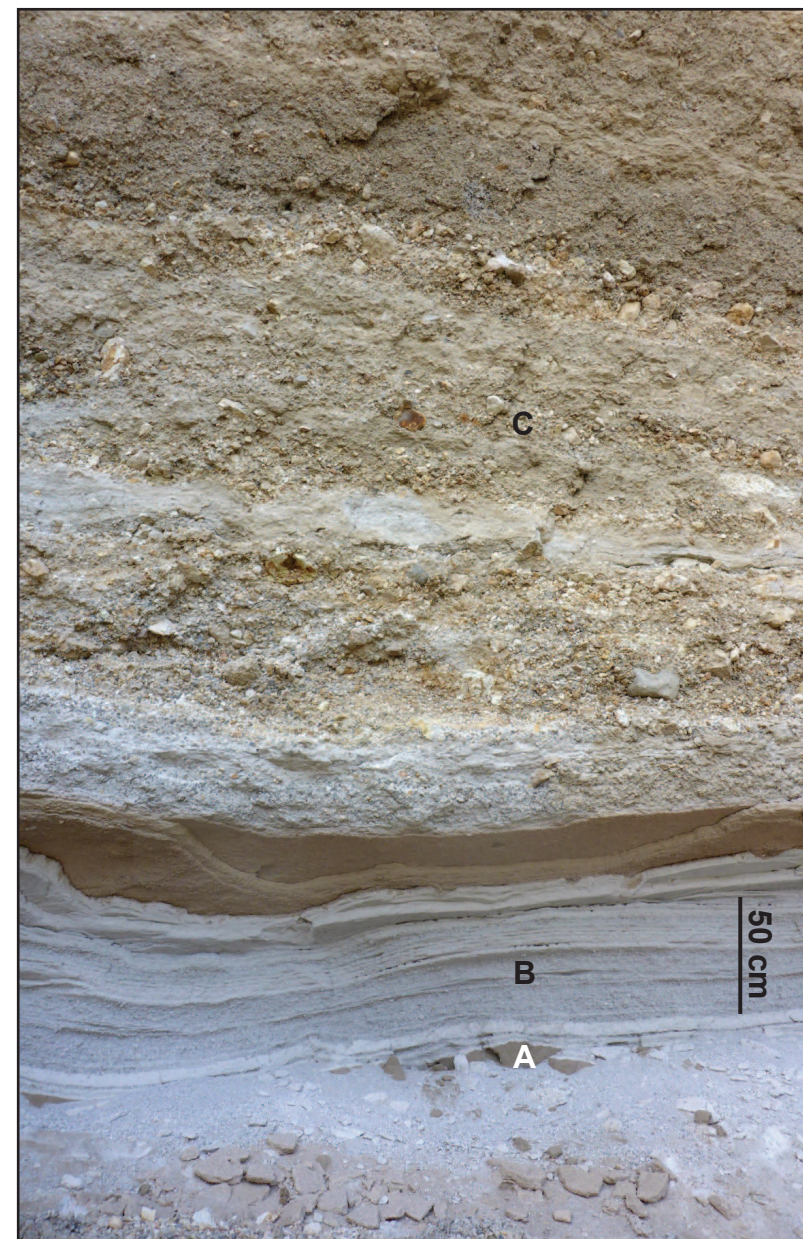



**Site 156 (Sta Maria, SW of Cerro El Brujo)**

N 19° 06.154'  
W 97° 35.691'  
2459 asl

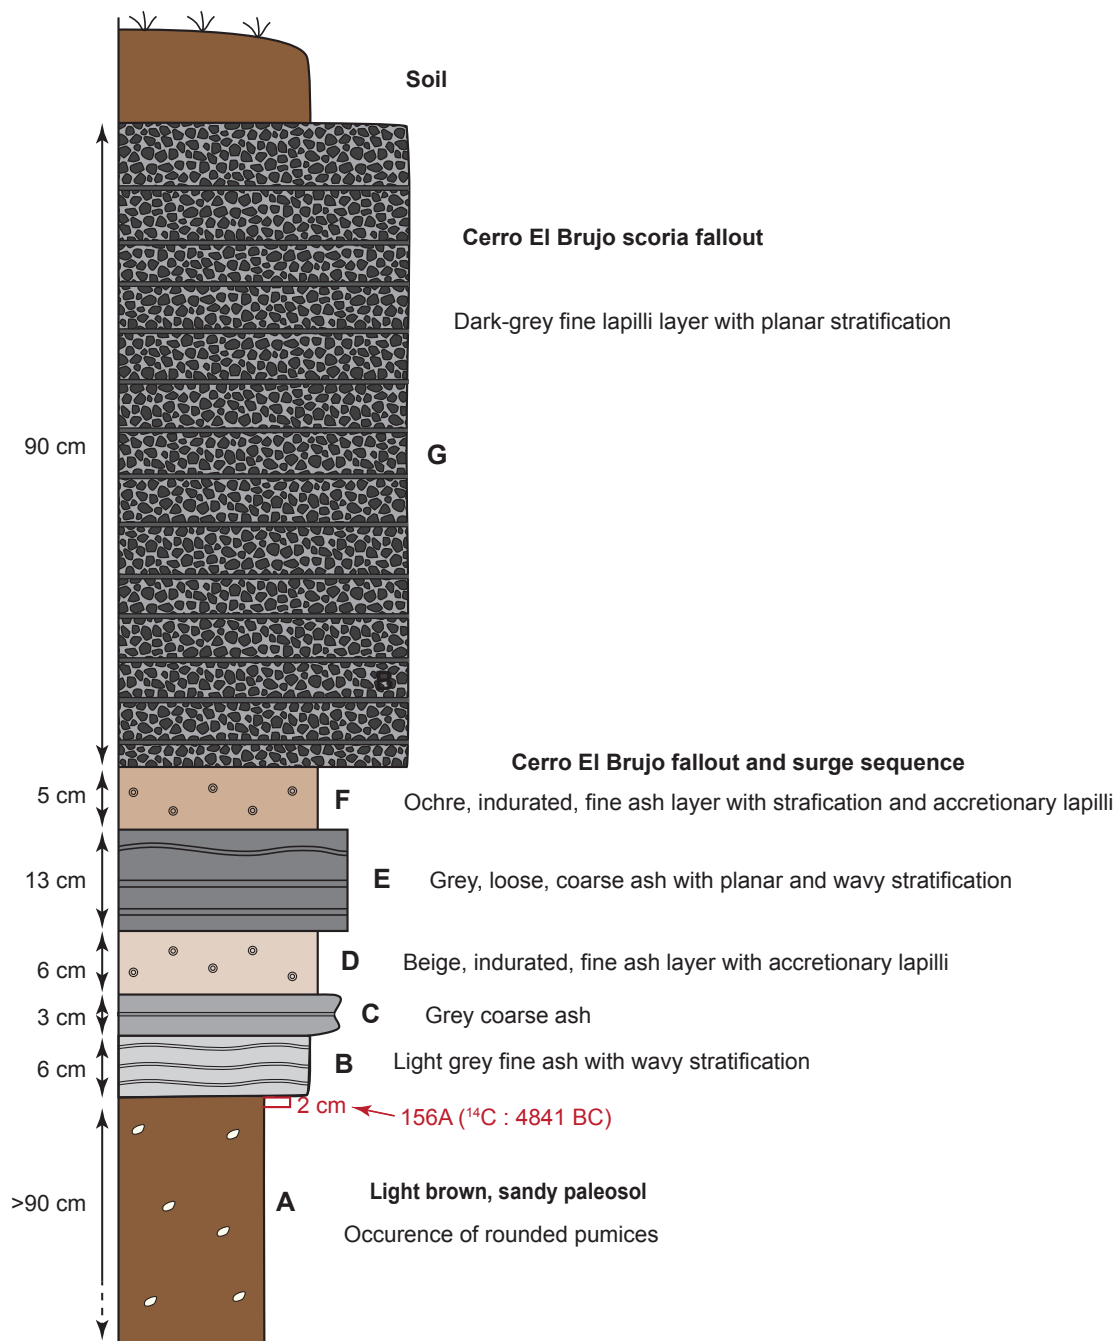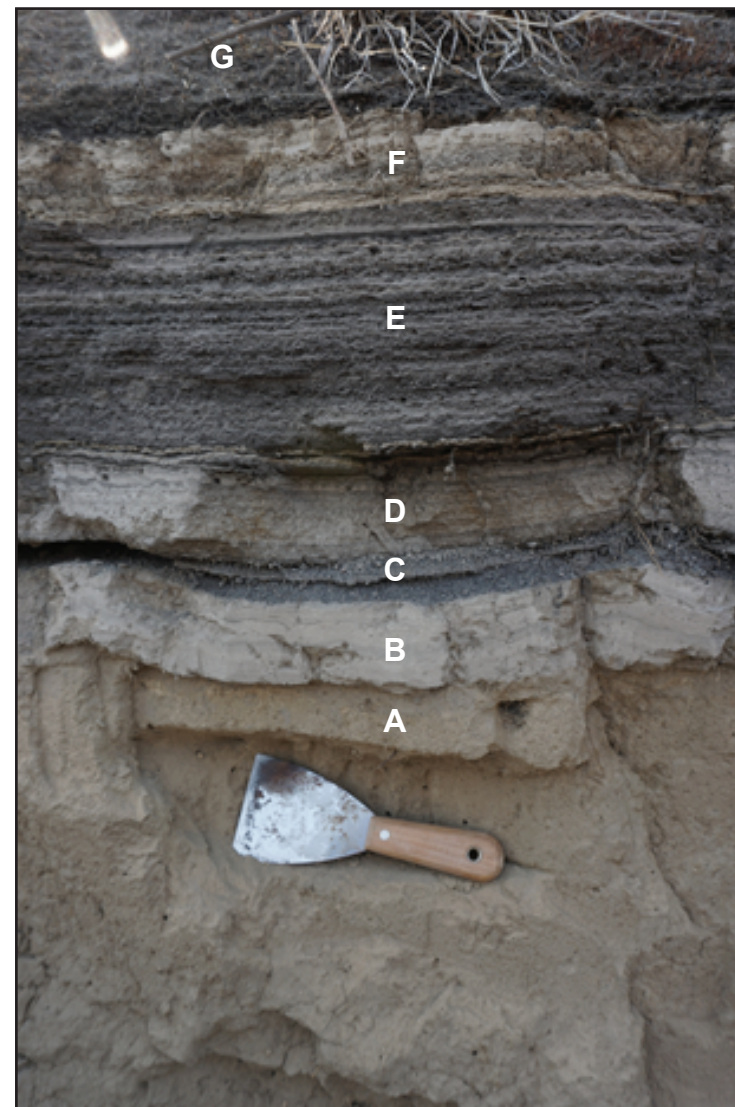

# Site 173 (SW of Cerro El Brujo)

N 19° 05.647'  
W 97° 36.104'  
2434 asl

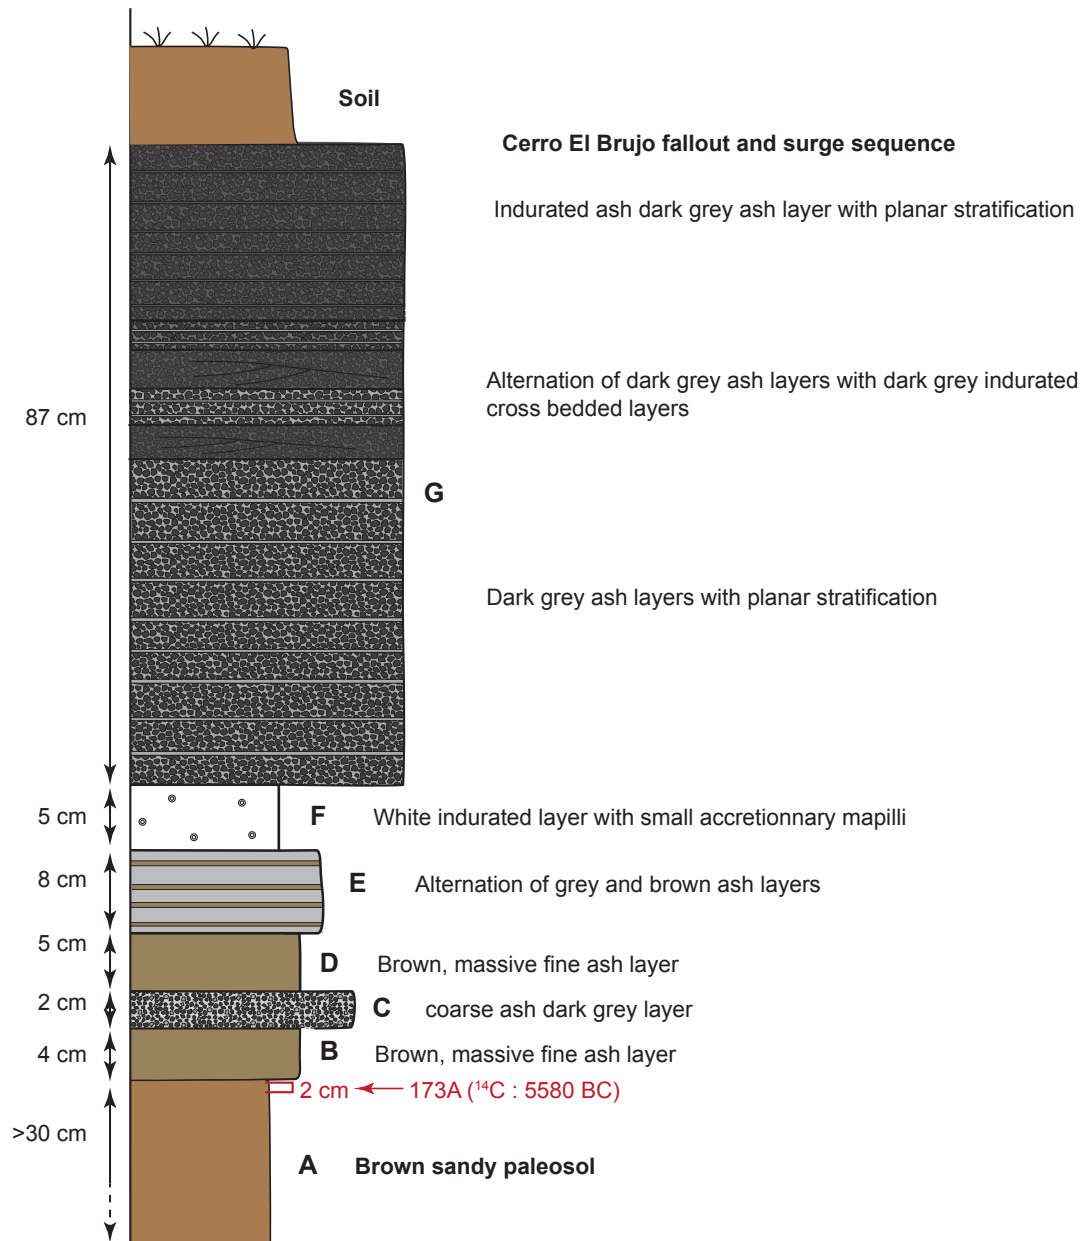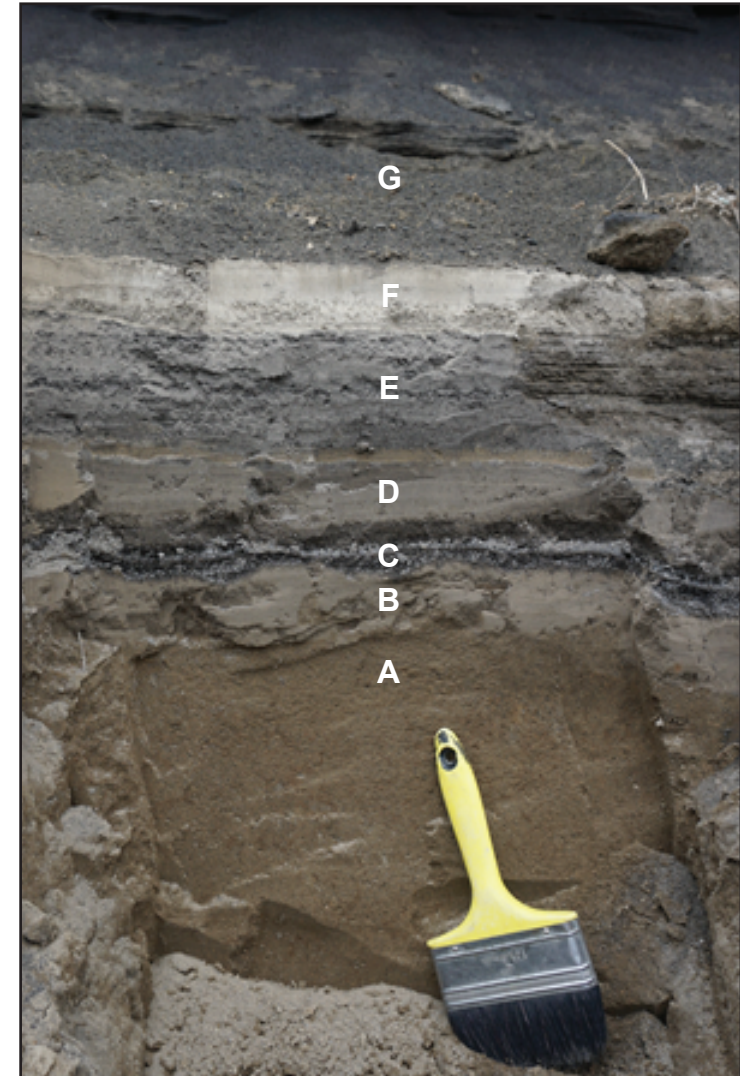

Supplement: Supplementary file 1 [file 19037312]
